# Supplementary material for: Structural and spin diversity of M(indenyl)2 transition-metal complexes: a DFT investigation
Source: Royal Society of Chemistry journal article supplement (doi:10.1039/c3nj00196b), 2013-01-01
Supplement: c3nj00196b.pdf [file c3nj00196b.pdf]

## Supplementary Information

### Structural and spin diversity of M(indenyl)<sub>2</sub> transition-metal complexes: A DFT Investigation

*Faïza Chekal,<sup>a</sup> Saber-Mustapha Zendaoui,<sup>a</sup> Bachir Zouchoune<sup>\*a,b</sup> and Jean-Yves Saillard<sup>\*c,d</sup>*

<sup>a</sup> *Unité de Recherche en Chimie de l'Environnement et Moléculaire Structurale, Université Mentouri-Constantine, 25000 Algeria*

<sup>b</sup> *Laboratoire de Chimie Appliquée et Technologie des Matériaux, Université Larbi Ben M'Hidi, Oum-el-Bouaghi, 04000 Algérie*

<sup>c</sup> *UMR 6226-Institut des Sciences Chimiques de Rennes, CNRS-Université de Rennes 1, Campus de Beaulieu, 35042 Rennes-Cedex, France*

<sup>d</sup> *Université Européenne de Bretagne, 5 bd Laënnec, 35000 Rennes, France*

**Figure S1.** The  $\pi$  MO diagram of the indenylide anion  $C_9H_7^-$

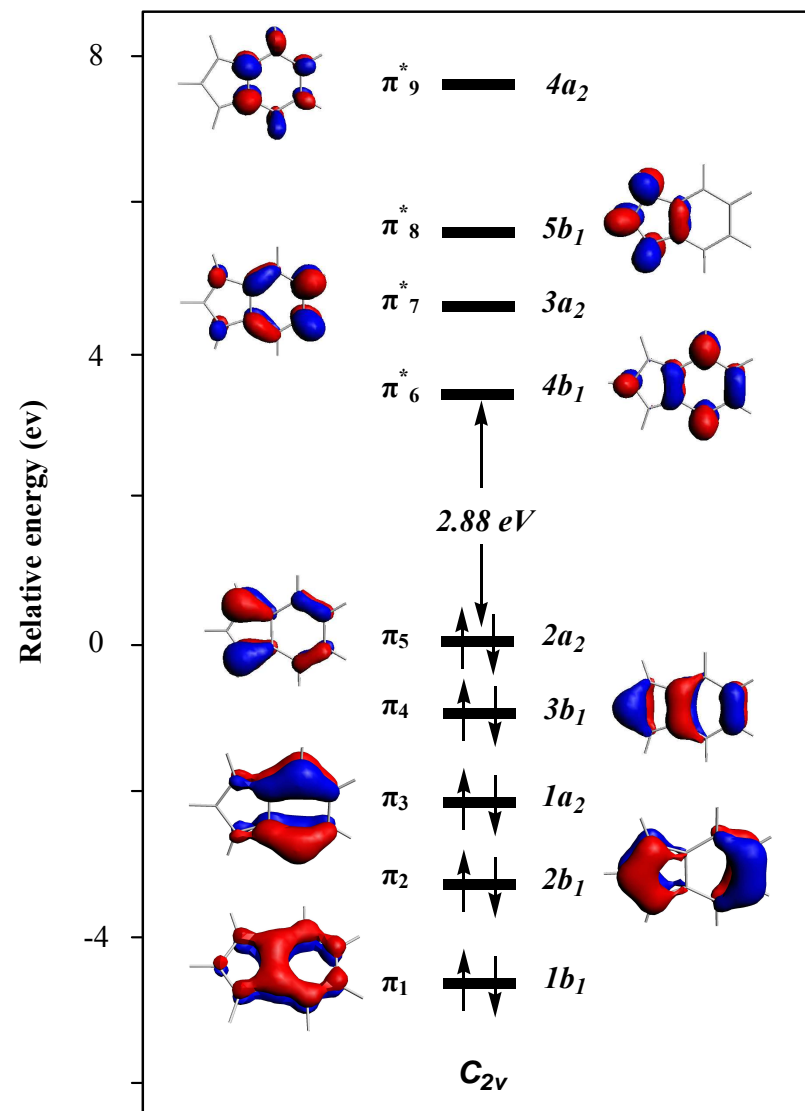

**Table S1.** Selected bond distances (in Å) for the  $[\text{Sc}(\text{Ind})_2]^+$  isomers of lowest energy.

| TNE = 20                |                                          |                                                       |
|-------------------------|------------------------------------------|-------------------------------------------------------|
| Isomer                  | $[\text{Sc}(\eta^{5+2}\text{-Ind})_2]^+$ | $[\text{Sc}(\eta^9\text{-Ind})(\eta^5\text{-Ind})]^+$ |
| Spin state and symmetry | S = 0 ( $C_i$ )                          | S = 0 ( $C_s$ )                                       |
| Sc-C(1)                 | 2.501                                    | 2.438                                                 |
| Sc-C(2)                 | 2.538                                    | 2.442                                                 |
| Sc-C(3)                 | 2.544                                    | 2.438                                                 |
| Sc-C(4)                 | 2.963                                    | -                                                     |
| Sc-C(5)                 | -                                        | -                                                     |
| Sc-C(6)                 | -                                        | -                                                     |
| Sc-C(7)                 | 2.921                                    | -                                                     |
| Sc-C(8)                 | 2.492                                    | 2.500                                                 |
| Sc-C(9)                 | 2.512                                    | 2.500                                                 |
| Sc-C'(1)                | 2.529                                    | 2.611                                                 |
| Sc-C'(2)                | 2.544                                    | 2.759                                                 |
| Sc-C'(3)                | 2.562                                    | 2.611                                                 |
| Sc-C'(4)                | 2.961                                    | 2.733                                                 |
| Sc-C'(5)                | -                                        | 2.980                                                 |
| Sc-C'(6)                | -                                        | 2.980                                                 |
| Sc-C'(7)                | 2.943                                    | 2.733                                                 |
| Sc-C'(8)                | 2.478                                    | 2.322                                                 |
| Sc-C'(9)                | 2.482                                    | 2.322                                                 |

**Table S2.** Selected bond distances (in Å) for the Sc(Ind)<sub>2</sub> isomers of lowest energy.

| TNE = 21                |                                     |                                    |
|-------------------------|-------------------------------------|------------------------------------|
| Isomer                  | Sc( $\eta^{5+2}$ -Ind) <sub>2</sub> | Sc( $\eta^9$ -Ind)( $\eta^5$ -Ind) |
| Spin state and symmetry | S = 1/2 ( $C_1$ )                   | S = 1/2 ( $C_s$ )                  |
| Sc-C(1)                 | 2.536                               | 2.497                              |
| Sc-C(2)                 | 2.556                               | 2.474                              |
| Sc-C(3)                 | 2.563                               | 2.497                              |
| Sc-C(4)                 | 3.003                               | -                                  |
| Sc-C(5)                 | -                                   | -                                  |
| Sc-C(6)                 | -                                   | -                                  |
| Sc-C(7)                 | 2.991                               | -                                  |
| Sc-C(8)                 | 2.632                               | 2.581                              |
| Sc-C(9)                 | 2.598                               | 2.581                              |
| Sc-C'(1)                | 2.541                               | 2.809                              |
| Sc-C'(2)                | 2.570                               | 2.911                              |
| Sc-C'(3)                | 2.573                               | 2.809                              |
| Sc-C'(4)                | 2.986                               | 2.522                              |
| Sc-C'(5)                | -                                   | 2.656                              |
| Sc-C'(6)                | -                                   | 2.656                              |
| Sc-C'(7)                | 3.001                               | 2.522                              |
| Sc-C'(8)                | 2.522                               | 2.325                              |
| Sc-C'(9)                | 2.534                               | 2.325                              |

**Table S3.** Selected bond distances (in Å) for the  $[\text{Y}(\text{Ind})_2]^+$  isomers of lowest energy.

| TNE = 20                |                                         |                                                         |
|-------------------------|-----------------------------------------|---------------------------------------------------------|
| Isomer                  | $[\text{Y}(\eta^{5+2}\text{-Ind})_2]^+$ | $[\text{Y}(\eta^9\text{-Ind})(\eta^5\text{-Ind})]^{++}$ |
| Spin state and symmetry | S = 0 ( $C_1$ )                         | S = 0 ( $C_s$ )                                         |
| Y-C(1)                  | 2.690                                   | 2.622                                                   |
| Y-C(2)                  | 2.810                                   | 2.646                                                   |
| Y-C(3)                  | 2.720                                   | 2.622                                                   |
| Y-C(4)                  | 3.014                                   | -                                                       |
| Y-C(5)                  | -                                       | -                                                       |
| Y-C(6)                  | -                                       | -                                                       |
| Y-C(7)                  | 2.931                                   | -                                                       |
| Y-C(8)                  | 2.475                                   | 2.645                                                   |
| Y-C(9)                  | 2.502                                   | 2.645                                                   |
| Y-C'(1)                 | 2.709                                   | 2.770                                                   |
| Y-C'(2)                 | 2.794                                   | 2.913                                                   |
| Y-C'(3)                 | 2.662                                   | 2.770                                                   |
| Y-C'(4)                 | 2.961                                   | 2.890                                                   |
| Y-C'(5)                 | -                                       | 3.031                                                   |
| Y-C'(6)                 | -                                       | 3.031                                                   |
| Y-C'(7)                 | 3.048                                   | 2.890                                                   |
| Y-C'(8)                 | 2.506                                   | 2.493                                                   |
| Y-C'(9)                 | 2.480                                   | 2.493                                                   |

Table S4. Selected bond distances (in Å) for the  $Y(\text{Ind})_2$  isomers of lowest energy.

| TNE = 21                |                              |                                           |
|-------------------------|------------------------------|-------------------------------------------|
| Isomer                  | $Y(\eta^{5+2}\text{-Ind})_2$ | $Y(\eta^9\text{-Ind})(\eta^5\text{-Ind})$ |
| Spin state and symmetry | $S = 1/2 (C_I)$              | $S = 1/2 (C_s)$                           |
| Y-C(1)                  | 2.684                        | 2.691                                     |
| Y-C(2)                  | 2.811                        | 2.675                                     |
| Y-C(3)                  | 2.725                        | 2.691                                     |
| Y-C(4)                  | 3.102                        | -                                         |
| Y-C(5)                  | -                            | -                                         |
| Y-C(6)                  | -                            | -                                         |
| Y-C(7)                  | 3.089                        | -                                         |
| Y-C(8)                  | 2.513                        | 2.761                                     |
| Y-C(9)                  | 2.524                        | 2.761                                     |
| Y-C'(1)                 | 2.712                        | 2.878                                     |
| Y-C'(2)                 | 2.777                        | 2.975                                     |
| Y-C'(3)                 | 2.684                        | 2.875                                     |
| Y-C'(4)                 | 3.089                        | 2.831                                     |
| Y-C'(5)                 | -                            | 2.840                                     |
| Y-C'(6)                 | -                            | 2.840                                     |
| Y-C'(7)                 | 3.111                        | 2.831                                     |
| Y-C'(8)                 | 2.599                        | 2.462                                     |
| Y-C'(9)                 | 2.589                        | 2.462                                     |

**Table S5.** Selected bond distances (in Å) for the Ti(Ind)<sub>2</sub> isomers of lowest energy.

| TNE = 22                |                                    |                                    |                                 |                                    |                                    |                                 |
|-------------------------|------------------------------------|------------------------------------|---------------------------------|------------------------------------|------------------------------------|---------------------------------|
| Isomer                  | Ti( $\eta^9$ -Ind)( $\eta^5$ -Ind) | Ti( $\eta^9$ -Ind)( $\eta^6$ -Ind) | Ti( $\eta^5$ -Ind) <sub>2</sub> | Ti( $\eta^5$ -Ind)( $\eta^6$ -Ind) | Ti( $\eta^5$ -Ind)( $\eta^6$ -Ind) | Ti( $\eta^5$ -Ind) <sub>2</sub> |
| Spin state and Symmetry | S = 0 ( <i>C<sub>1</sub></i> )     | S = 0 ( <i>C<sub>s</sub></i> )     | S = 0 ( <i>C<sub>2v</sub></i> ) | S = 1 ( <i>C<sub>1</sub></i> )     | S = 1 ( <i>C<sub>s</sub></i> )     | S = 1 ( <i>C<sub>2v</sub></i> ) |
| Ti-C(1)                 | 2.601                              | 2.597                              | 2.298                           | 2.376                              | -                                  | 2.376                           |
| Ti-C(2)                 | 2.806                              | 2.824                              | 2.225                           | 2.376                              | -                                  | 2.356                           |
| Ti-C(3)                 | 2.558                              | 2.597                              | 2.298                           | 2.383                              | -                                  | 2.376                           |
| Ti-C(4)                 | -                                  | 2.369                              | -                               | -                                  | 2.446                              | -                               |
| Ti-C(5)                 | -                                  | 2.458                              | -                               | -                                  | 2.436                              | -                               |
| Ti-C(6)                 | -                                  | 2.458                              | -                               | -                                  | 2.436                              | -                               |
| Ti-C(7)                 | -                                  | 2.369                              | -                               | -                                  | 2.446                              | -                               |
| Ti-C(8)                 | 2.191                              | 2.196                              | 2.500                           | 2.434                              | 2.438                              | 2.475                           |
| Ti-C(9)                 | 2.172                              | 2.196                              | 2.500                           | 2.442                              | 2.438                              | 2.475                           |
| Ti-C'(1)                | 2.329                              | -                                  | 2.298                           | -                                  | -                                  | 2.376                           |
| Ti-C'(2)                | 2.333                              | -                                  | 2.225                           | -                                  | -                                  | 2.356                           |
| Ti-C'(3)                | 2.383                              | -                                  | 2.298                           | -                                  | -                                  | 2.376                           |
| Ti-C'(4)                | 2.301                              | 2.386                              | -                               | 2.423                              | 2.447                              | -                               |
| Ti-C'(5)                | 2.439                              | 2.368                              | -                               | 2.424                              | 2.433                              | -                               |
| Ti-C'(6)                | 2.446                              | 2.368                              | -                               | 2.441                              | 2.433                              | -                               |
| Ti-C'(7)                | 2.326                              | 2.386                              | -                               | 2.445                              | 2.447                              | -                               |
| Ti-C'(8)                | 2.471                              | 2.508                              | 2.500                           | 2.429                              | 2.442                              | 2.475                           |
| Ti-C'(9)                | 2.505                              | 2.508                              | 2.500                           | 2.425                              | 2.442                              | 2.475                           |

**Table S6.** Selected bond distances (in Å) for the Zr(Ind)<sub>2</sub> isomers of lowest energy.

| TNE = 22                |                                    |                                    |                                 |                                   |                                    |                                 |
|-------------------------|------------------------------------|------------------------------------|---------------------------------|-----------------------------------|------------------------------------|---------------------------------|
| Isomer                  | Zr( $\eta^9$ -Ind)( $\eta^5$ -Ind) | Zr( $\eta^9$ -Ind)( $\eta^6$ -Ind) | Zr( $\eta^5$ -Ind) <sub>2</sub> | Zr( $\eta^5$ -Ind)( $\eta^6$ Ind) | Zr( $\eta^5$ -Ind)( $\eta^6$ -Ind) | Zr( $\eta^5$ -Ind) <sub>2</sub> |
| Spin state and symmetry | S = 0 ( <i>C<sub>i</sub></i> )     | S = 0 ( <i>C<sub>s</sub></i> )     | S = 0 ( <i>C<sub>2v</sub></i> ) | S = 1 ( <i>C<sub>i</sub></i> )    | S = 1 ( <i>C<sub>s</sub></i> )     | S = 1 ( <i>C<sub>2v</sub></i> ) |
| Zr-C(1)                 | 2.501                              | 2.683                              | 2.442                           | 2.542                             | 2.530                              | 2.526                           |
| Zr-C(2)                 | 2.524                              | 2.879                              | 2.384                           | 2.556                             | 2.511                              | 2.543                           |
| Zr-C(3)                 | 2.555                              | 2.683                              | 2.442                           | 2.556                             | 2.530                              | 2.526                           |
| Zr-C(4)                 | -                                  | 2.344                              | -                               | -                                 | 3.136                              | -                               |
| Zr-C(5)                 | -                                  | 2.614                              | -                               | -                                 | 4.131                              | -                               |
| Zr-C(6)                 | -                                  | 2.614                              | -                               | -                                 | 4.131                              | -                               |
| Zr-C(7)                 | -                                  | 2.344                              | -                               | -                                 | 3.131                              | -                               |
| Zr-C(8)                 | 2.652                              | 2.519                              | 2.601                           | 2.553                             | 2.567                              | 2.541                           |
| Zr-C(9)                 | 2.621                              | 2.519                              | 2.601                           | 2.542                             | 2.567                              | 2.541                           |
| Zr-C'(1)                | 2.672                              | -                                  | 2.442                           | -                                 | -                                  | 2.526                           |
| Zr-C'(2)                | 2.860                              | -                                  | 2.384                           | -                                 | -                                  | 2.543                           |
| Zr-C'(3)                | 2.640                              | -                                  | 2.442                           | -                                 | -                                  | 2.526                           |
| Zr-C'(4)                | 2.428                              | 2.651                              | -                               | 2.555                             | 2.576                              | -                               |
| Zr-C'(5)                | 2.570                              | 2.681                              | -                               | 2.584                             | 2.571                              | -                               |
| Zr-C'(6)                | 2.586                              | 2.681                              | -                               | 2.611                             | 2.571                              | -                               |
| Zr-C'(7)                | 2.465                              | 2.651                              | -                               | 2.588                             | 2.576                              | -                               |
| Zr-C'(8)                | 2.310                              | 2.680                              | 2.601                           | 2.532                             | 2.572                              | 2.541                           |
| Zr-C'(9)                | 2.322                              | 2.680                              | 2.601                           | 2.532                             | 2.572                              | 2.541                           |



**Table S7.** Selected bond distances (in Å) for the V(Ind)<sub>2</sub> isomers of lowest energy.

| TNE = 23                |                                    |                                    |                                   |                                   |                                    |                                    |
|-------------------------|------------------------------------|------------------------------------|-----------------------------------|-----------------------------------|------------------------------------|------------------------------------|
| Isomer                  | V( $\eta^5$ -Ind) <sub>2</sub>     |                                    | V( $\eta^5$ -Ind)( $\eta^6$ -Ind) |                                   | V( $\eta^6$ -Ind) <sub>2</sub>     |                                    |
| Spin state and symmetry | S = 1/2 ( <i>C</i> <sub>2v</sub> ) | S = 3/2 ( <i>C</i> <sub>2v</sub> ) | S = 1/2 ( <i>C</i> <sub>s</sub> ) | S = 3/2 ( <i>C</i> <sub>i</sub> ) | S = 1/2 ( <i>C</i> <sub>2h</sub> ) | S = 3/2 ( <i>C</i> <sub>2v</sub> ) |
| V-C(1)/V-C(4)           | 2.307                              | 2.221                              | 2.264                             | 2.307                             | 2.272                              | 2.385                              |
| V-C(2)/V-C(5)           | 2.302                              | 2.172                              | 2.226                             | 2.299                             | 2.299                              | 2.281                              |
| V-C(3)/V-C(6)           | 2.307                              | 2.221                              | 2.264                             | 2.315                             | 2.299                              | 2.281                              |
| V-C(7)                  | -                                  | -                                  | -                                 | -                                 | 2.272                              | 2.385                              |
| V-C(8)                  | 2.368                              | 2.387                              | 2.419                             | 2.376                             | 2.307                              | 2.500                              |
| V-C(9)                  | 2.368                              | 2.387                              | 2.419                             | 2.364                             | 2.307                              | 2.500                              |
| V-C'(1)/V-C'(4)         | 2.307                              | 2.221                              | 2.285                             | 2.373                             | 2.272                              | 2.385                              |
| V-C'(2)/V-C'(5)         | 2.302                              | 2.172                              | 2.277                             | 2.314                             | 2.299                              | 2.281                              |
| V-C'(3)/V-C'(6)         | 2.307                              | 2.221                              | 2.277                             | 2.315                             | 2.299                              | 2.281                              |
| V-C'(7)                 | -                                  | -                                  | 2.285                             | 2.365                             | 2.272                              | 2.385                              |
| V-C'(8)                 | 2.368                              | 2.387                              | 2.275                             | 2.432                             | 2.307                              | 2.500                              |
| V-C'(9)                 | 2.368                              | 2.387                              | 2.275                             | 2.436                             | 2.307                              | 2.500                              |

**Table S8.** Selected bond distances (in Å) for the Nb(Ind)<sub>2</sub> isomers of lowest energy.

| TNE = 23                |                                    |                                    |                                    |                                   |                                    |                                    |
|-------------------------|------------------------------------|------------------------------------|------------------------------------|-----------------------------------|------------------------------------|------------------------------------|
| Isomer                  | Nb( $\eta^5$ -Ind) <sub>2</sub>    |                                    | Nb( $\eta^5$ -Ind)( $\eta^6$ -Ind) |                                   | Nb( $\eta^6$ -Ind) <sub>2</sub>    |                                    |
| Spin state and Symmetry | S = 1/2 ( <i>C</i> <sub>2v</sub> ) | S = 3/2 ( <i>C</i> <sub>2v</sub> ) | S = 1/2 ( <i>C</i> <sub>s</sub> )  | S = 3/2 ( <i>C</i> <sub>i</sub> ) | S = 1/2 ( <i>C</i> <sub>2h</sub> ) | S = 3/2 ( <i>C</i> <sub>2v</sub> ) |
| Nb-C(1)/Nb-C(4)         | 2.307                              | 2.221                              | 2.422                              | 2.446                             | 2.432                              | 2.510                              |
| Nb-C(2)/Nb-C(5)         | 2.302                              | 2.172                              | 2.403                              | 2.450                             | 2.434                              | 2.438                              |
| Nb-C(3)/Nb-C(6)         | 2.307                              | 2.221                              | 2.422                              | 2.446                             | 2.434                              | 2.425                              |
| Nb-C(7)                 | -                                  | -                                  | -                                  | -                                 | 2.432                              | 2.474                              |
| Nb-C(8)                 | 2.368                              | 2.387                              | 2.538                              | 2.507                             | 2.481                              | 2.546                              |
| Nb-C(9)                 | 2.368                              | 2.387                              | 2.538                              | 2.510                             | 2.481                              | 2.569                              |
| Nb-C'(1)/Nb-C'(4)       | 2.307                              | 2.221                              | 2.365                              | 2.552                             | 2.432                              | 2.474                              |
| Nb-C'(2)/Nb-C'(5)       | 2.302                              | 2.172                              | 2.405                              | 2.461                             | 2.434                              | 2.425                              |
| Nb-C'(3)/Nb-C'(6)       | 2.307                              | 2.221                              | 2.405                              | 2.460                             | 2.434                              | 2.438                              |
| Nb-C'(7)                | -                                  | -                                  | 2.365                              | 2.494                             | 2.432                              | 2.510                              |
| Nb-C'(8)                | 2.368                              | 2.387                              | 2.406                              | 2.544                             | 2.481                              | 2.569                              |
| Nb-C'(9)                | 2.368                              | 2.387                              | 2.406                              | 2.562                             | 2.481                              | 2.546                              |

**Table S9.** Selected bond distances (in Å) for the Cr(Ind)<sub>2</sub> isomers of lowest energy.

| TNE = 24                |                                      |                          |                                              |                                      |
|-------------------------|--------------------------------------|--------------------------|----------------------------------------------|--------------------------------------|
| Isomer                  | Cr(η <sup>5</sup> -Ind) <sub>2</sub> |                          | Cr(η <sup>5</sup> -Ind)(η <sup>6</sup> -Ind) | Cr(η <sup>6</sup> -Ind) <sub>2</sub> |
| Spin state and symmetry | S = 1 (C <sub>2v</sub> )             | S = 2 (C <sub>2v</sub> ) | S = 1 (C <sub>s</sub> )                      | S = 1 (C <sub>2h</sub> )             |
| Cr-C(1)/Cr-C(4)         | 2.178                                | 2.314                    | 2.194                                        | 2.234                                |
| Cr-C(2)/Cr-C(5)         | 2.132                                | 2.264                    | 2.157                                        | 2.214                                |
| Cr-C(3)/Cr-C(6)         | 2.178                                | 2.314                    | 2.194                                        | 2.214                                |
| Cr-C(7)                 | -                                    | -                        | -                                            | 2.234                                |
| Cr-C(8)                 | 2.317                                | 2.554                    | 2.326                                        | 2.332                                |
| Cr-C(9)                 | 2.317                                | 2.554                    | 2.326                                        | 2.332                                |
| Cr-C'(1)/Cr-C'(4)       | 2.178                                | 2.314                    | 2.211                                        | 2.234                                |
| Cr-C'(2)/Cr-C'(5)       | 2.132                                | 2.264                    | 2.196                                        | 2.214                                |
| Cr-C'(3)/Cr-C'(6)       | 2.178                                | 2.314                    | 2.196                                        | 2.214                                |
| Cr-C'(7)                | -                                    | -                        | 2.211                                        | 2.234                                |
| Cr-C'(8)                | 2.317                                | 2.554                    | 2.319                                        | 2.332                                |
| Cr-C'(9)                | 2.317                                | 2.554                    | 2.319                                        | 2.332                                |

**Table S10.** Selected bond distances (in Å) for the Mo(Ind)<sub>2</sub> isomers of lowest energy.

| TNE = 24                |                                  |                                  |                                    |                                 |                                 |
|-------------------------|----------------------------------|----------------------------------|------------------------------------|---------------------------------|---------------------------------|
| Isomer                  | Mo( $\eta^5$ -Ind) <sub>2</sub>  |                                  | Mo( $\eta^5$ -Ind)( $\eta^6$ -Ind) |                                 | Mo( $\eta^6$ -Ind) <sub>2</sub> |
| Spin state and symmetry | S = 0 ( <i>C</i> <sub>2v</sub> ) | S = 1 ( <i>C</i> <sub>2v</sub> ) | S = 0 ( <i>C</i> <sub>s</sub> )    | S = 1 ( <i>C</i> <sub>s</sub> ) | S = 0 ( <i>C</i> <sub>2</sub> ) |
| Mo-C(1)/Mo-C(4)         | 2.301                            | 2.321                            | 2.335                              | 2.342                           | 2.295                           |
| Mo-C(2)/Mo-C(5)         | 2.291                            | 2.282                            | 2.329                              | 2.311                           | 2.383                           |
| Mo-C(3)/Mo-C(6)         | 2.301                            | 2.321                            | 2.335                              | 2.342                           | 2.425                           |
| Mo-C(7)                 | -                                | -                                | -                                  | -                               | 2.399                           |
| Mo-C(8)                 | 2.403                            | 2.472                            | 2.448                              | 2.472                           | 2.336                           |
| Mo-C(9)                 | 2.403                            | 2.472                            | 2.446                              | 2.472                           | 2.215                           |
| Mo-C'(1)/Mo-C'(4)       | 2.301                            | 2.321                            | 2.329                              | 2.352                           | 2.399                           |
| Mo-C'(2)/Mo-C'(5)       | 2.291                            | 2.282                            | 2.359                              | 2.311                           | 2.425                           |
| Mo-C'(3)/Mo-C'(6)       | 2.301                            | 2.321                            | 2.359                              | 2.311                           | 2.383                           |
| Mo-C'(7)                | -                                | -                                | 2.329                              | 2.352                           | 2.295                           |
| Mo-C'(8)                | 2.403                            | 2.472                            | 2.373                              | 2.447                           | 2.215                           |
| Mo-C'(9)                | 2.403                            | 2.472                            | 2.373                              | 2.447                           | 2.336                           |

**Table S11.** Selected bond distances (in Å) for the M(Ind)<sub>2</sub> (M = Mn, Re) isomers of lowest energy.

| TNE = 25                |                                   |                                    |                                    |                                    |                                    |                                    |                                    |
|-------------------------|-----------------------------------|------------------------------------|------------------------------------|------------------------------------|------------------------------------|------------------------------------|------------------------------------|
| Isomer                  | Mn( $\eta^5$ -Ind) <sub>2</sub>   |                                    |                                    | Mn( $\eta^5$ -Ind)( $\eta^6$ -Ind) | Re( $\eta^5$ -Ind) <sub>2</sub>    | Re( $\eta^5$ -Ind)( $\eta^6$ -Ind) | Re( $\eta^6$ -Ind) <sub>2</sub>    |
| Spin state and symmetry | S = 5/2 ( <i>C</i> <sub>2</sub> ) | S = 3/2 ( <i>C</i> <sub>2h</sub> ) | S = 1/2 ( <i>C</i> <sub>2v</sub> ) | S = 5/2 ( <i>C</i> <sub>s</sub> )  | S = 1/2 ( <i>C</i> <sub>2v</sub> ) | S = 1/2 ( <i>C</i> <sub>s</sub> )  | S = 1/2 ( <i>C</i> <sub>2h</sub> ) |
| M-C(1)/M-C(4)           | 2.261                             | 2.191                              | 2.128                              | 2.389                              | 2.248                              | 2.261                              | 2.303                              |
| M-C(2)/M-C(5)           | 2.304                             | 2.112                              | 2.088                              | 2.281                              | 2.249                              | 2.271                              | 2.285                              |
| M-C(3)/M-C(6)           | 2.562                             | 2.191                              | 2.128                              | 2.389                              | 2.248                              | 2.261                              | 2.285                              |
| M-C(7)                  | -                                 | -                                  | -                                  | -                                  | -                                  | -                                  | 2.303                              |
| M-C(8)                  | 2.563                             | 2.517                              | 2.262                              | 2.600                              | 2.319                              | 2.336                              | 2.348                              |
| M-C(9)                  | 2.601                             | 2.517                              | 2.262                              | 2.600                              | 2.319                              | 2.336                              | 2.348                              |
| M-C'(1)/M-C'(4)         | 2.562                             | 2.191                              | 2.128                              | 2.567                              | 2.248                              | 2.290                              | 2.303                              |
| M-C'(2)/M-C'(5)         | 2.304                             | 2.112                              | 2.088                              | 2.319                              | 2.249                              | 2.263                              | 2.285                              |
| M-C'(3)/M-C'(6)         | 2.261                             | 2.191                              | 2.128                              | 2.319                              | 2.248                              | 2.263                              | 2.285                              |
| M-C'(7)                 | -                                 | -                                  | -                                  | 2.567                              | -                                  | 2.290                              | 2.303                              |
| M-C'(8)                 | 2.601                             | 2.517                              | 2.262                              | 2.760                              | 2.319                              | 2.314                              | 2.348                              |
| M-C'(9)                 | 2.563                             | 2.517                              | 2.262                              | 2.760                              | 2.319                              | 2.314                              | 2.348                              |

**Table S12.** Selected bond distances (in Å) for the M(Ind)<sub>2</sub> (M = Fe, Ru) isomers of lowest energy.

| Isomer                  | Fe(Ind) <sub>2</sub>                 |                          |                                              | Ru(Ind) <sub>2</sub>                 |                                              |
|-------------------------|--------------------------------------|--------------------------|----------------------------------------------|--------------------------------------|----------------------------------------------|
|                         | Fe(η <sup>5</sup> -Ind) <sub>2</sub> |                          | Fe(η <sup>5</sup> -Ind)(η <sup>6</sup> -Ind) | Ru(η <sup>5</sup> -Ind) <sub>2</sub> | Ru(η <sup>5</sup> -Ind)(η <sup>6</sup> -Ind) |
| Spin state and symmetry | S = 0 (C <sub>2v</sub> )             | S = 1 (C <sub>2v</sub> ) | S = 0 (C <sub>s</sub> )                      | S = 0 (C <sub>2v</sub> )             | S = 0 (C <sub>s</sub> )                      |
| M-C(1)/M-C(4)           | 2.079                                | 2.147                    | 2.063                                        | 2.241                                | 2.242                                        |
| M-C(2)/M-C(5)           | 2.063                                | 2.125                    | 2.049                                        | 2.228                                | 2.222                                        |
| M-C(3)/M-C(6)           | 2.079                                | 2.147                    | 2.063                                        | 2.241                                | 2.242                                        |
| M-C(7)                  | -                                    | -                        | -                                            | -                                    | -                                            |
| M-C(8)                  | 2.153                                | 2.362                    | 2.148                                        | 2.309                                | 2.340                                        |
| M-C(9)                  | 2.153                                | 2.362                    | 2.148                                        | 2.309                                | 2.340                                        |
| M-C'(1)/M-C'(4)         | 2.079                                | 2.147                    | 2.143                                        | 2.241                                | 2.320                                        |
| M-C'(2)/M-C'(5)         | 2.063                                | 2.125                    | 2.309                                        | 2.228                                | 2.213                                        |
| M-C'(3)/M-C'(6)         | 2.079                                | 2.147                    | 2.309                                        | 2.241                                | 2.213                                        |
| M-C'(7)                 | 2.153                                | 2.362                    | 2.143                                        | -                                    | 2.320                                        |
| M-C'(8)                 | 2.153                                | 2.362                    | 2.368                                        | 2.309                                | 2.524                                        |
| M-C'(9)                 | 2.153                                | 2.362                    | 2.368                                        | 2.309                                | 2.524                                        |

**Table S13.** Selected bond distances (in Å) for the M(Ind)<sub>2</sub> (M = Co, Re) isomers of lowest energy.

| Isomer                  | Co(Ind) <sub>2</sub>                 |                                              | Rh(Ind) <sub>2</sub> S = 1/2         |                                              |
|-------------------------|--------------------------------------|----------------------------------------------|--------------------------------------|----------------------------------------------|
|                         | Co(η <sup>5</sup> -Ind) <sub>2</sub> | Co(η <sup>5</sup> -Ind)(η <sup>6</sup> -Ind) | Rh(η <sup>5</sup> -Ind) <sub>2</sub> | Re(η <sup>5</sup> -Ind)(η <sup>4</sup> -Ind) |
| Spin state and symmetry | S = 1/2 (C <sub>2v</sub> )           | S = 1/2 (C <sub>1</sub> )                    | S = 1/2 (C <sub>2v</sub> )           | S = 1/2 (C <sub>s</sub> )                    |
| M-C(1)/M-C(4)           | 2.104                                | 2.095                                        | 2.263                                | 2.259                                        |
| M-C(2)/M-C(5)           | 2.101                                | 2.077                                        | 2.239                                | 2.219                                        |
| M-C(3)/M-C(6)           | 2.104                                | 2.091                                        | 2.263                                | 2.259                                        |
| M-C(7)                  | -                                    | -                                            | -                                    | -                                            |
| M-C(8)                  | 2.271                                | 2.332                                        | 2.461                                | 2.518                                        |
| M-C(9)                  | 2.271                                | 2.340                                        | 2.461                                | 2.518                                        |
| M-C'(1)/M-C'(4)         | 2.104                                | 2.214                                        | 2.263                                | 2.398                                        |
| M-C'(2)/M-C'(5)         | 2.101                                | 2.123                                        | 2.239                                | 2.229                                        |
| M-C'(3)/M-C'(6)         | 2.104                                | 2.135                                        | 2.263                                | 2.229                                        |
| M-C'(7)                 | -                                    | 2.286                                        | -                                    | 2.398                                        |
| M-C'(8)                 | 2.271                                | 2.399                                        | 2.461                                | 2.746                                        |
| M-C'(9)                 | 2.271                                | 2.334                                        | 2.461                                | 2.746                                        |

**Table S14.** Selected bond distances (in Å) for the M(Ind)<sub>2</sub> (M = Ni, Pd) isomers of lowest energy.

| Isomer                  | Ni(Ind) <sub>2</sub>             |                                    |                                  | Pd(Ind) <sub>2</sub>             |                                    |
|-------------------------|----------------------------------|------------------------------------|----------------------------------|----------------------------------|------------------------------------|
|                         | Ni( $\eta^3$ -Ind) <sub>2</sub>  | Ni( $\eta^3$ -Ind)( $\eta^4$ -Ind) | Ni( $\eta^5$ -Ind) <sub>2</sub>  | Pd( $\eta^3$ -Ind) <sub>2</sub>  | Pd( $\eta^3$ -Ind)( $\eta^4$ -Ind) |
| Spin state and symmetry | S = 0 ( <i>C</i> <sub>2h</sub> ) | S = 0 ( <i>C</i> <sub>s</sub> )    | S = 1 ( <i>C</i> <sub>2h</sub> ) | S = 0 ( <i>C</i> <sub>2h</sub> ) | S = 0 ( <i>C</i> <sub>s</sub> )    |
| M-C(1)/M-C(4)           | 2.125                            | 2.226                              | 2.222                            | 2.355                            | 2.370                              |
| M-C(2)/M-C(5)           | 2.034                            | 2.175                              | 2.127                            | 2.227                            | 2.220                              |
| M-C(3)/M-C(6)           | 2.125                            | 2.226                              | 2.222                            | 2.355                            | 2.370                              |
| M-C(7)                  | -                                | -                                  | -                                | -                                | -                                  |
| M-C(8)                  | 2.525                            | 2.573                              | 2.407                            | 2.798                            | 2.820                              |
| M-C(9)                  | 2.525                            | 2.573                              | 2.407                            | 2.798                            | 2.820                              |
| M-C'(1)/M-C'(4)         | 2.125                            | 2.468                              | 2.222                            | 2.355                            | 2.787                              |
| M-C'(2)/M-C'(5)         | 2.034                            | 2.133                              | 2.127                            | 2.227                            | 2.295                              |
| M-C'(3)/M-C'(6)         | 2.125                            | 2.133                              | 2.222                            | 2.355                            | 2.295                              |
| M-C'(7)                 | -                                | 2.468                              | -                                | -                                | 2.787                              |
| M-C'(8)                 | 2.525                            | 2.780                              | 2.407                            | 2.798                            | 3.247                              |
| M-C'(9)                 | 2.525                            | 2.780                              | 2.407                            | 2.798                            | 3.247                              |

**Table S15.**

The total bonding energies in (eV) and cartesian coordinates in (Å) are given for the  $M(\text{Ind})_2$  compounds ( $M = \text{Sc-Ni, Y-Mo, Re, Ru-Pd}$ ) obtained from BP86 optimizations and the corresponding B3LYP single-point calculations.

**Compounds for TNE = 20**

$[\text{Sc}(\eta^{5+2}\text{-Ind})_2]^+ (C_7) S = 0, E_T (\text{BP86}) = -201.866, E_T (\text{B3LYP/BP86}) = -237.556.$

| Atom | X         | Y         | Z         |
|------|-----------|-----------|-----------|
| 1.Sc | -0.013592 | 0.007260  | -0.248662 |
| 2.C  | 2.359616  | 0.016877  | -0.821264 |
| 3.C  | 2.074027  | -1.213688 | -0.098266 |
| 4.C  | 1.701141  | -0.851679 | 1.242009  |
| 5.C  | 1.818175  | 0.561112  | 1.355432  |
| 6.C  | 2.171582  | 1.109109  | 0.100210  |
| 7.C  | 2.054508  | -2.450046 | -0.796716 |
| 8.C  | 2.340721  | -2.457004 | -2.153821 |
| 9.C  | 2.639857  | -1.257656 | -2.855487 |
| 10.C | 2.646206  | -0.030237 | -2.212546 |
| 11.H | 1.470125  | -1.540118 | 2.049635  |
| 12.H | 1.645438  | 1.131972  | 2.263767  |
| 13.H | 2.340818  | 2.161815  | -0.114332 |
| 14.H | 1.848785  | -3.380278 | -0.266472 |
| 15.H | 2.353495  | -3.403284 | -2.694621 |
| 16.H | 2.876709  | -1.310548 | -3.917799 |
| 17.H | 2.887859  | 0.882969  | -2.757149 |
| 18.C | -2.373086 | -0.020191 | -0.801021 |
| 19.C | -2.089528 | 1.209717  | -0.074884 |
| 20.C | -1.721853 | 0.845587  | 1.265884  |
| 21.C | -1.836247 | -0.567308 | 1.375449  |
| 22.C | -2.187991 | -1.113266 | 0.119165  |
| 23.C | -2.035722 | 2.442770  | -0.777889 |
| 24.C | -2.284923 | 2.448681  | -2.142752 |
| 25.C | -2.582400 | 1.250644  | -2.847348 |
| 26.C | -2.623437 | 0.026201  | -2.199479 |
| 27.H | -1.489944 | 1.532724  | 2.074251  |
| 28.H | -1.663378 | -1.140725 | 2.282125  |
| 29.H | -2.354110 | -2.165801 | -0.098082 |
| 30.H | -1.828479 | 3.371958  | -0.246308 |
| 31.H | -2.268626 | 3.392591  | -2.687407 |
| 32.H | -2.788783 | 1.300887  | -3.916068 |
| 33.H | -2.862392 | -0.885614 | -2.747704 |

$[\text{Sc}(\eta^9\text{-Ind})(\eta^5\text{-Ind})]^+ (C_5) S = 0, E_T (\text{BP86}) = -201.751, E_T (\text{B3LYP/BP86}) = -237.367.$

| Atom | X         | Y        | Z         |
|------|-----------|----------|-----------|
| 1.Sc | 0.261035  | 0.434700 | 0.000000  |
| 2.C  | -2.115319 | 0.158141 | 0.726874  |
| 3.C  | -2.115319 | 0.158141 | -0.726874 |
| 4.C  | -1.630936 | 1.444453 | -1.158875 |
| 5.C  | -1.394132 | 2.230222 | 0.000000  |
| 6.C  | -1.630936 | 1.444453 | 1.158875  |



|      |           |           |           |
|------|-----------|-----------|-----------|
| 7.C  | -2.589252 | -0.983318 | -1.433775 |
| 8.C  | -3.062197 | -2.060979 | -0.712294 |
| 9.C  | -3.062197 | -2.060979 | 0.712294  |
| 10.C | -2.589252 | -0.983318 | 1.433775  |
| 11.H | -1.558901 | 1.789555  | -2.188062 |
| 12.H | -1.065087 | 3.267282  | 0.000000  |
| 13.H | -1.558901 | 1.789555  | 2.188062  |
| 14.H | -2.619948 | -0.982493 | -2.523996 |
| 15.H | -3.464196 | -2.925945 | -1.240168 |
| 16.H | -3.464196 | -2.925945 | 1.240168  |
| 17.H | -2.619948 | -0.982493 | 2.523996  |
| 18.C | 2.300890  | -0.397222 | 0.735134  |
| 19.C | 2.556175  | 0.817347  | 1.434276  |
| 20.C | 2.694501  | 1.999083  | 0.715400  |
| 21.C | 2.694501  | 1.999083  | -0.715400 |
| 22.C | 2.556175  | 0.817347  | -1.434276 |
| 23.C | 2.300890  | -0.397222 | -0.735134 |
| 24.C | 1.533951  | -1.528251 | 1.159281  |
| 25.C | 1.080541  | -2.200113 | 0.000000  |
| 26.C | 1.533951  | -1.528251 | -1.159281 |
| 27.H | 2.547030  | 0.835541  | 2.525699  |
| 28.H | 2.824047  | 2.942619  | -1.245125 |
| 29.H | 2.547030  | 0.835541  | -2.525699 |
| 30.H | 2.824047  | 2.942619  | 1.245125  |
| 31.H | 1.342801  | -1.822841 | 2.187969  |
| 32.H | 0.460035  | -3.092898 | 0.000000  |
| 33.H | 1.342801  | -1.822841 | -2.187969 |

**$[Y(\eta^{5+2}\text{-Ind})_2]^+ (C_I) S = 0, E_T (\text{BP86}) = -202.123, E_T (\text{B3LYP/BP86}) = -237.012.$**

| Atom | X         | Y         | Z         |
|------|-----------|-----------|-----------|
| 1.Y  | -0.001988 | 0.004306  | -0.359281 |
| 2.C  | 2.561266  | 0.018474  | -0.700031 |
| 3.C  | 2.209169  | -1.280404 | -0.144236 |
| 4.C  | 1.780675  | -1.069000 | 1.211537  |
| 5.C  | 1.917600  | 0.315798  | 1.493331  |
| 6.C  | 2.346947  | 1.000204  | 0.330425  |
| 7.C  | 2.159945  | -2.417036 | -0.994356 |
| 8.C  | 2.472288  | -2.267433 | -2.339445 |
| 9.C  | 2.835489  | -1.003320 | -2.877673 |
| 10.C | 2.878381  | 0.131557  | -2.080237 |
| 11.H | 1.507669  | -1.842144 | 1.924157  |
| 12.H | 1.717292  | 0.781548  | 2.455129  |
| 13.H | 2.568576  | 2.062453  | 0.258884  |
| 14.H | 1.909690  | -3.398341 | -0.589144 |
| 15.H | 2.459107  | -3.138238 | -2.994857 |
| 16.H | 3.095634  | -0.930450 | -3.933646 |
| 17.H | 3.173724  | 1.093464  | -2.501978 |
| 18.C | -2.560298 | -0.021226 | -0.695767 |
| 19.C | -2.213828 | 1.278762  | -0.137590 |
| 20.C | -1.786160 | 1.067270  | 1.218059  |
| 21.C | -1.917405 | -0.318246 | 1.498138  |
| 22.C | -2.343773 | -1.003155 | 0.334214  |

|      |           |           |           |
|------|-----------|-----------|-----------|
| 23.C | -2.161867 | 2.415721  | -0.986974 |
| 24.C | -2.464771 | 2.266040  | -2.334271 |
| 25.C | -2.821236 | 1.001117  | -2.875193 |
| 26.C | -2.868371 | -0.133964 | -2.077967 |
| 27.H | -1.516508 | 1.840913  | 1.931461  |
| 28.H | -1.715615 | -0.784188 | 2.459567  |
| 29.H | -2.560889 | -2.066276 | 0.261923  |
| 30.H | -1.916057 | 3.397263  | -0.579397 |
| 31.H | -2.448842 | 3.137152  | -2.989249 |
| 32.H | -3.074175 | 0.927705  | -3.932888 |
| 33.H | -3.159884 | -1.095583 | -2.503253 |

**$[\text{Y}(\eta^9\text{-Ind})(\eta^5\text{-Ind})]^+ (\text{C}_5) \text{S} = 0, E_{\text{T}} (\text{BP86}) = -201.894, E_{\text{T}} (\text{B3LYP/BP86}) = -236.990.$**

| Atom | X         | Y         | Z         |
|------|-----------|-----------|-----------|
| 1.Y  | 0.247792  | 0.406166  | 0.000000  |
| 2.C  | -2.309218 | 0.224468  | 0.727579  |
| 3.C  | -2.309218 | 0.224468  | -0.727579 |
| 4.C  | -1.825427 | 1.511318  | -1.160623 |
| 5.C  | -1.589920 | 2.294772  | 0.000000  |
| 6.C  | -1.825427 | 1.511318  | 1.160623  |
| 7.C  | -2.774465 | -0.921768 | -1.432384 |
| 8.C  | -3.235046 | -2.008178 | -0.711327 |
| 9.C  | -3.235046 | -2.008178 | 0.711327  |
| 10.C | -2.774465 | -0.921768 | 1.432384  |
| 11.H | -1.781754 | 1.866391  | -2.188137 |
| 12.H | -1.277723 | 3.337487  | 0.000000  |
| 13.H | -1.781754 | 1.866391  | 2.188137  |
| 14.H | -2.810133 | -0.922430 | -2.522815 |
| 15.H | -3.626411 | -2.877105 | -1.240506 |
| 16.H | -3.626411 | -2.877105 | 1.240506  |
| 17.H | -2.810133 | -0.922430 | 2.522815  |
| 18.C | 2.488494  | -0.405567 | 0.736244  |
| 19.C | 2.676427  | 0.820157  | 1.433392  |
| 20.C | 2.731416  | 2.012388  | 0.716411  |
| 21.C | 2.731416  | 2.012388  | -0.716411 |
| 22.C | 2.676427  | 0.820157  | -1.433392 |
| 23.C | 2.488494  | -0.405567 | -0.736244 |
| 24.C | 1.836754  | -1.602965 | 1.160746  |
| 25.C | 1.450585  | -2.315257 | 0.000000  |
| 26.C | 1.836754  | -1.602965 | -1.160746 |
| 27.H | 2.684650  | 0.836102  | 2.525298  |
| 28.H | 2.814703  | 2.961126  | -1.246182 |
| 29.H | 2.684650  | 0.836102  | -2.525298 |
| 30.H | 2.814703  | 2.961126  | 1.246182  |
| 31.H | 1.694429  | -1.927220 | 2.188951  |
| 32.H | 0.933941  | -3.272514 | 0.000000  |
| 33.H | 1.694429  | -1.927220 | -2.188951 |

### Compounds for TNE = 21

**$[\text{Sc}(\eta^{5+2}\text{-Ind})_2] (\text{C}_1) \text{S} = 1/2, E_{\text{T}} (\text{BP86}) = -206.825, E_{\text{T}} (\text{B3LYP/BP86}) = -242.355.$**

| Atom | X         | Y         | Z         |
|------|-----------|-----------|-----------|
| 1.Sc | -0.004342 | 0.008688  | -0.194103 |
| 2.C  | 2.387979  | 0.015041  | -0.726753 |
| 3.C  | 2.082766  | -1.289346 | -0.165212 |
| 4.C  | 1.746606  | -1.093676 | 1.215217  |
| 5.C  | 1.893087  | 0.287757  | 1.501209  |
| 6.C  | 2.247919  | 0.984986  | 0.322648  |
| 7.C  | 2.007759  | -2.421455 | -1.016870 |
| 8.C  | 2.304710  | -2.271791 | -2.369988 |
| 9.C  | 2.596466  | -1.000154 | -2.918023 |
| 10.C | 2.606983  | 0.144671  | -2.126082 |
| 11.H | 1.488621  | -1.871910 | 1.927375  |
| 12.H | 1.727763  | 0.746604  | 2.472872  |
| 13.H | 2.432117  | 2.052189  | 0.240349  |
| 14.H | 1.761829  | -3.400621 | -0.604857 |
| 15.H | 2.286431  | -3.142761 | -3.025486 |
| 16.H | 2.798243  | -0.915714 | -3.986320 |
| 17.H | 2.817066  | 1.122185  | -2.561338 |
| 18.C | -2.390646 | -0.020471 | -0.721323 |
| 19.C | -2.092461 | 1.283127  | -0.154447 |
| 20.C | -1.761027 | 1.085347  | 1.226657  |
| 21.C | -1.902801 | -0.297288 | 1.507461  |
| 22.C | -2.247675 | -0.992926 | 0.325023  |
| 23.C | -1.996042 | 2.414710  | -1.005481 |
| 24.C | -2.278855 | 2.267030  | -2.362481 |
| 25.C | -2.570751 | 0.997336  | -2.914300 |
| 26.C | -2.591541 | -0.148782 | -2.123299 |
| 27.H | -1.508875 | 1.862611  | 1.942000  |
| 28.H | -1.738531 | -0.758888 | 2.478119  |
| 29.H | -2.425200 | -2.060909 | 0.238675  |
| 30.H | -1.748826 | 3.392257  | -0.590441 |
| 31.H | -2.247554 | 3.138088  | -3.017390 |
| 32.H | -2.757786 | 0.913224  | -3.985403 |
| 33.H | -2.794967 | -1.125992 | -2.562397 |

**[Sc( $\eta^9$ -Ind)( $\eta^5$ -Ind)] ( $C_5$ ) S = 1/2,  $E_T$  (BP86) = -207.076,  $E_T$  (B3LYP/BP86) = -242.339.**

| Atom | X         | Y         | Z         |
|------|-----------|-----------|-----------|
| 1.Sc | 0.331307  | 0.387579  | 0.000000  |
| 2.C  | -2.141374 | 0.247304  | 0.726718  |
| 3.C  | -2.141374 | 0.247304  | -0.726718 |
| 4.C  | -1.579334 | 1.495122  | -1.164255 |
| 5.C  | -1.287800 | 2.258461  | 0.000000  |
| 6.C  | -1.579334 | 1.495122  | 1.164255  |
| 7.C  | -2.670052 | -0.872089 | -1.427642 |
| 8.C  | -3.195556 | -1.931555 | -0.711900 |
| 9.C  | -3.195556 | -1.931555 | 0.711900  |
| 10.C | -2.670052 | -0.872089 | 1.427642  |
| 11.H | -1.488126 | 1.834078  | -2.192421 |
| 12.H | -0.883779 | 3.268394  | 0.000000  |
| 13.H | -1.488126 | 1.834078  | 2.192421  |
| 14.H | -2.685215 | -0.877146 | -2.519146 |
| 15.H | -3.625027 | -2.781887 | -1.243445 |
| 16.H | -3.625027 | -2.781887 | 1.243445  |
| 17.H | -2.685215 | -0.877146 | 2.519146  |

|      |          |           |           |
|------|----------|-----------|-----------|
| 18.C | 2.380739 | -0.432024 | 0.730724  |
| 19.C | 2.351983 | 0.811361  | 1.448695  |
| 20.C | 2.312008 | 2.007553  | 0.711001  |
| 21.C | 2.312008 | 2.007553  | -0.711001 |
| 22.C | 2.351983 | 0.811361  | -1.448695 |
| 23.C | 2.380739 | -0.432024 | -0.730724 |
| 24.C | 1.838945 | -1.681951 | 1.154883  |
| 25.C | 1.527180 | -2.433659 | 0.000000  |
| 26.C | 1.838945 | -1.681951 | -1.154883 |
| 27.H | 2.324484 | 0.823194  | 2.537752  |
| 28.H | 2.232570 | 2.959712  | -1.235768 |
| 29.H | 2.324484 | 0.823194  | -2.537752 |
| 30.H | 2.232570 | 2.959712  | 1.235768  |
| 31.H | 1.690996 | -1.993354 | 2.185945  |
| 32.H | 1.100414 | -3.434792 | 0.000000  |
| 33.H | 1.690996 | -1.993354 | -2.185945 |

$Y(\eta^{5+2}\text{-Ind})_2(C_I)S = 0$ ,  $E_T(\text{BP86}) = -207.117$ ,  $E_T(\text{B3LYP/BP86}) = -241.687$ .

| Atom | X         | Y         | Z         |
|------|-----------|-----------|-----------|
| 1.Y  | 0.119618  | 0.530292  | -0.095796 |
| 2.C  | 1.190203  | 0.316744  | 2.251694  |
| 3.C  | 0.362860  | -0.868384 | 2.081004  |
| 4.C  | -1.008253 | -0.452993 | 2.165942  |
| 5.C  | -1.019892 | 0.941036  | 2.403098  |
| 6.C  | 0.309326  | 1.436547  | 2.423488  |
| 7.C  | 0.968084  | -2.100374 | 1.705097  |
| 8.C  | 2.355602  | -2.160930 | 1.570130  |
| 9.C  | 3.158656  | -1.009385 | 1.728010  |
| 10.C | 2.589035  | 0.232950  | 2.019122  |
| 11.H | -1.879351 | -1.100909 | 2.113266  |
| 12.H | -1.915138 | 1.543106  | 2.545154  |
| 13.H | 0.607183  | 2.463651  | 2.618008  |
| 14.H | 0.355785  | -2.992040 | 1.560046  |
| 15.H | 2.828586  | -3.109064 | 1.310838  |
| 16.H | 4.237350  | -1.086184 | 1.586441  |
| 17.H | 3.214449  | 1.121493  | 2.120695  |
| 18.C | 1.119354  | -0.281576 | -2.970391 |
| 19.C | 0.364898  | 0.872252  | -2.610364 |
| 20.C | -1.056975 | 0.744267  | -2.326165 |
| 21.C | -1.666852 | -0.539966 | -2.377744 |
| 22.C | -0.918059 | -1.633490 | -2.838988 |
| 23.C | 0.455211  | -1.504777 | -3.127780 |
| 24.C | -1.481882 | 1.964166  | -1.702660 |
| 25.C | -0.358483 | 2.828009  | -1.642187 |
| 26.C | 0.778338  | 2.172780  | -2.167328 |
| 27.H | 2.189697  | -0.199579 | -3.164291 |
| 28.H | -2.723035 | -0.654613 | -2.129185 |
| 29.H | -1.394729 | -2.610335 | -2.928385 |
| 30.H | 1.020006  | -2.384136 | -3.440357 |
| 31.H | -2.495442 | 2.208305  | -1.395301 |
| 32.H | -0.369607 | 3.843497  | -1.25123  |
| 33.H | 1.775937  | 2.594047  | -2.258879 |

**$Y(\eta^9\text{-Ind})(\eta^5\text{-Ind}) (C_5) S = 0$ ,  $E_T (\text{BP86}) = -207.187$ ,  $E_T (\text{B3LYP/BP86}) = -241.671$ .**

| Atom | X         | Y         | Z         |
|------|-----------|-----------|-----------|
| 1.Y  | 0.374459  | 0.405127  | 0.000000  |
| 2.C  | -2.283963 | 0.243668  | 0.727359  |
| 3.C  | -2.283963 | 0.243668  | -0.727359 |
| 4.C  | -1.781764 | 1.516429  | -1.164035 |
| 5.C  | -1.523343 | 2.290677  | 0.000000  |
| 6.C  | -1.781764 | 1.516429  | 1.164035  |
| 7.C  | -2.764730 | -0.897514 | -1.427918 |
| 8.C  | -3.242956 | -1.980147 | -0.711773 |
| 9.C  | -3.242956 | -1.980147 | 0.711773  |
| 10.C | -2.764730 | -0.897514 | 1.427918  |
| 11.H | -1.723943 | 1.865085  | -2.191883 |
| 12.H | -1.182165 | 3.324663  | 0.000000  |
| 13.H | -1.723943 | 1.865085  | 2.191883  |
| 14.H | -2.781669 | -0.903797 | -2.519462 |
| 15.H | -3.634290 | -2.848534 | -1.243648 |
| 16.H | -3.634290 | -2.848534 | 1.243648  |
| 17.H | -2.781669 | -0.903797 | 2.519462  |
| 18.C | 2.561613  | -0.468000 | 0.728358  |
| 19.C | 2.609965  | 0.775462  | 1.454150  |
| 20.C | 2.627482  | 1.973241  | 0.709466  |
| 21.C | 2.627482  | 1.973241  | -0.709466 |
| 22.C | 2.609965  | 0.775462  | -1.454150 |
| 23.C | 2.561613  | -0.468000 | -0.728358 |
| 24.C | 1.924331  | -1.674960 | 1.155177  |
| 25.C | 1.547701  | -2.398691 | 0.000000  |
| 26.C | 1.924331  | -1.674960 | -1.155177 |
| 27.H | 2.613116  | 0.788014  | 2.543101  |
| 28.H | 2.617051  | 2.931263  | -1.232480 |
| 29.H | 2.613116  | 0.788014  | -2.543101 |
| 30.H | 2.617051  | 2.931263  | 1.232480  |
| 31.H | 1.765336  | -1.980603 | 2.186299  |
| 32.H | 1.042157  | -3.362997 | 0.000000  |
| 33.H | 1.765336  | -1.980603 | -2.186299 |

### Compounds for TNE = 22

**$[\text{Ti}(\eta^9\text{-Ind})(\eta^5\text{-Ind})] (C_1) S = 0$ ,  $E_T (\text{BP86}) = -208.692$ ,  $E_T (\text{B3LYP/BP86}) = -244.142$ .**

| Atom | X         | Y         | Z         |
|------|-----------|-----------|-----------|
| 1.Ti | -0.129608 | 0.365946  | -0.348916 |
| 2.C  | 1.107173  | 0.285065  | 1.788483  |
| 3.C  | 0.642178  | -1.066028 | 1.555547  |
| 4.C  | -0.796322 | -1.017563 | 1.472552  |
| 5.C  | -1.219903 | 0.319514  | 1.713682  |
| 6.C  | -0.051335 | 1.136417  | 1.847338  |
| 7.C  | 1.581164  | -2.125402 | 1.457146  |
| 8.C  | 2.930763  | -1.848744 | 1.606412  |
| 9.C  | 3.388550  | -0.523113 | 1.819702  |
| 10.C | 2.501261  | 0.539324  | 1.889834  |

|      |           |           |           |
|------|-----------|-----------|-----------|
| 11.H | -1.449321 | -1.874233 | 1.332820  |
| 12.H | -2.248092 | 0.654092  | 1.806894  |
| 13.H | -0.043780 | 2.205691  | 2.044517  |
| 14.H | 1.239209  | -3.149796 | 1.297854  |
| 15.H | 3.657181  | -2.661256 | 1.556551  |
| 16.H | 4.458365  | -0.340158 | 1.930730  |
| 17.H | 2.861891  | 1.554374  | 2.066339  |
| 18.C | 0.919143  | -0.509701 | -2.231342 |
| 19.C | 0.446265  | 0.852531  | -2.405973 |
| 20.C | -0.948992 | 1.179251  | -2.188551 |
| 21.C | -1.899175 | 0.148733  | -1.803966 |
| 22.C | -1.412195 | -1.182673 | -1.729619 |
| 23.C | -0.049561 | -1.498349 | -1.929688 |
| 24.C | -0.986518 | 2.460049  | -1.541239 |
| 25.C | 0.341526  | 2.925117  | -1.398777 |
| 26.C | 1.225478  | 1.950673  | -1.904148 |
| 27.H | 1.971354  | -0.757674 | -2.352519 |
| 28.H | -2.946601 | 0.387432  | -1.635059 |
| 29.H | -2.078010 | -1.972009 | -1.380117 |
| 30.H | 0.284204  | -2.514230 | -1.716026 |
| 31.H | -1.887893 | 2.973872  | -1.218064 |
| 32.H | 0.634921  | 3.871732  | -0.947827 |
| 33.H | 2.311606  | 1.989749  | -1.888822 |

**[Ti( $\eta^9$ -Ind)( $\eta^5$ -Ind)] (C<sub>1</sub>) S = 1, E<sub>T</sub> (BP86) = -208.552, E<sub>T</sub> (B3LYP/BP86) = -243.939**

| Atom | X         | Y         | Z         |
|------|-----------|-----------|-----------|
| 1.Ti | -0.101619 | 0.026447  | -0.175477 |
| 2.C  | 1.112247  | 0.211898  | 1.926582  |
| 3.C  | 0.638454  | -1.158696 | 1.827762  |
| 4.C  | -0.798150 | -1.116239 | 1.795947  |
| 5.C  | -1.195879 | 0.244648  | 1.922171  |
| 6.C  | -0.040995 | 1.073942  | 1.955742  |
| 7.C  | 1.575230  | -2.221341 | 1.722618  |
| 8.C  | 2.930418  | -1.933473 | 1.769431  |
| 9.C  | 3.393995  | -0.595257 | 1.869146  |
| 10.C | 2.509827  | 0.470966  | 1.922825  |
| 11.H | -1.463040 | -1.975102 | 1.754085  |
| 12.H | -2.223496 | 0.596579  | 1.969077  |
| 13.H | -0.032366 | 2.155188  | 2.061675  |
| 14.H | 1.226828  | -3.252609 | 1.642252  |
| 15.H | 3.657077  | -2.745497 | 1.718907  |
| 16.H | 4.467862  | -0.405409 | 1.895403  |
| 17.H | 2.877396  | 1.496424  | 1.992196  |
| 18.C | 0.903093  | -0.318375 | -2.377788 |
| 19.C | 0.483136  | 1.040559  | -2.304302 |
| 20.C | -0.935147 | 1.348318  | -2.030191 |
| 21.C | -1.853489 | 0.279087  | -1.829801 |
| 22.C | -1.401680 | -1.053683 | -1.912876 |
| 23.C | -0.034694 | -1.349114 | -2.191364 |
| 24.C | -1.050901 | 2.763916  | -1.966548 |

|      |           |           |           |
|------|-----------|-----------|-----------|
| 25.C | 0.225239  | 3.310423  | -2.188947 |
| 26.C | 1.171618  | 2.278264  | -2.372209 |
| 27.H | 1.948902  | -0.564885 | -2.567910 |
| 28.H | -2.901862 | 0.483693  | -1.608687 |
| 29.H | -2.101599 | -1.871621 | -1.745196 |
| 30.H | 0.290660  | -2.388100 | -2.232001 |
| 31.H | -1.966816 | 3.319904  | -1.780882 |
| 32.H | 0.455229  | 4.374174  | -2.195033 |
| 33.H | 2.236662  | 2.404370  | -2.552378 |

**[Ti( $\eta^9$ -Ind)( $\eta^6$ -Ind)] ( $C_5$ ) S = 0,  $E_T$  (BP86) = -207.762,  $E_T$  (B3LYP/BP86) = -243.579.**

| Atom | X         | Y         | Z         |
|------|-----------|-----------|-----------|
| 1.Ti | 0.117847  | 0.364846  | 0.000000  |
| 2.C  | 2.133207  | 0.851085  | 0.725102  |
| 3.C  | 2.133207  | 0.851085  | -0.725102 |
| 4.C  | 1.836079  | -0.358866 | -1.461044 |
| 5.C  | 1.537637  | -1.511626 | -0.710667 |
| 6.C  | 1.537637  | -1.511626 | 0.710667  |
| 7.C  | 1.836079  | -0.358866 | 1.461044  |
| 8.C  | 1.637717  | 2.129049  | -1.150343 |
| 9.C  | 1.362876  | 2.899824  | 0.000000  |
| 10.C | 1.637717  | 2.129049  | 1.150343  |
| 11.H | 1.794738  | -0.356855 | -2.547921 |
| 12.H | 1.178199  | -2.404432 | -1.220808 |
| 13.H | 1.178199  | -2.404432 | 1.220808  |
| 14.H | 1.794738  | -0.356855 | 2.547921  |
| 15.H | 1.484458  | 2.430190  | -2.183288 |
| 16.H | 0.969468  | 3.914995  | 0.000000  |
| 17.H | 1.484458  | 2.430190  | 2.183288  |
| 18.C | -1.936223 | 1.304212  | 0.710328  |
| 19.C | -1.759254 | 0.110067  | 1.451412  |
| 20.C | -1.754123 | -1.130801 | 0.741275  |
| 21.C | -1.754123 | -1.130801 | -0.741275 |
| 22.C | -1.759254 | 0.110067  | -1.451412 |
| 23.C | -1.936223 | 1.304212  | -0.710328 |
| 24.C | -1.764022 | -2.483319 | -1.159029 |
| 25.C | -1.801019 | -3.285927 | 0.000000  |
| 26.C | -1.764022 | -2.483319 | 1.159029  |
| 27.H | -1.984981 | 2.256933  | 1.237886  |
| 28.H | -1.984981 | 2.256933  | -1.237886 |
| 29.H | -1.767994 | 0.133206  | -2.540251 |
| 30.H | -1.767994 | 0.133206  | 2.540251  |
| 31.H | -1.779381 | -2.831968 | -2.189113 |
| 32.H | -1.852568 | -4.373984 | 0.000000  |
| 33.H | -1.779381 | -2.831968 | 2.189113  |

**[Ti( $\eta^9$ -Ind)( $\eta^6$ -Ind)] ( $C_5$ ) S = 1,  $E_T$  (BP86) = -207.763,  $E_T$  (B3LYP/BP86) = -243.945.**

| Atom | X         | Y         | Z        |
|------|-----------|-----------|----------|
| 1.Ti | -0.012373 | -0.053862 | 0.000000 |

|      |           |           |           |
|------|-----------|-----------|-----------|
| 2.C  | 2.009307  | 1.085822  | 0.739852  |
| 3.C  | 2.009307  | 1.085822  | -0.739852 |
| 4.C  | 1.964498  | -0.154377 | -1.436384 |
| 5.C  | 1.915550  | -1.360234 | -0.713761 |
| 6.C  | 1.915550  | -1.360234 | 0.713761  |
| 7.C  | 1.964498  | -0.154377 | 1.436384  |
| 8.C  | 2.014850  | 2.443017  | -1.156639 |
| 9.C  | 2.038506  | 3.247855  | 0.000000  |
| 10.C | 2.014850  | 2.443017  | 1.156639  |
| 11.H | 1.955366  | -0.173179 | -2.527393 |
| 12.H | 1.856244  | -2.309087 | -1.245572 |
| 13.H | 1.856244  | -2.309087 | 1.245572  |
| 14.H | 1.955366  | -0.173179 | 2.527393  |
| 15.H | 2.016843  | 2.792468  | -2.186362 |
| 16.H | 2.054716  | 4.336383  | 0.000000  |
| 17.H | 2.016843  | 2.792468  | 2.186362  |
| 18.C | -1.939242 | 1.249320  | 0.713870  |
| 19.C | -1.990985 | 0.043437  | 1.436387  |
| 20.C | -2.039749 | -1.196698 | 0.740034  |
| 21.C | -2.039749 | -1.196698 | -0.740034 |
| 22.C | -1.990985 | 0.043437  | -1.436387 |
| 23.C | -1.939242 | 1.249320  | -0.713870 |
| 24.C | -2.056000 | -2.553633 | -1.156817 |
| 25.C | -2.085623 | -3.357982 | 0.000000  |
| 26.C | -2.056000 | -2.553633 | 1.156817  |
| 27.H | -1.877682 | 2.198344  | 1.245097  |
| 28.H | -1.877682 | 2.198344  | -1.245097 |
| 29.H | -1.982038 | 0.062416  | -2.527417 |
| 30.H | -1.982038 | 0.062416  | 2.527417  |
| 31.H | -2.059582 | -2.903216 | -2.186497 |
| 32.H | -2.109563 | -4.446347 | 0.000000  |
| 33.H | -2.059582 | -2.903216 | 2.186497  |

**[Ti( $\eta^5$ -Ind)<sub>2</sub>] (C<sub>2v</sub>) S = 0, E<sub>T</sub> (BP86) = -207.951, E<sub>T</sub> (B3LYP/BP86) = -244.166.**

| Atom | X         | Y        | Z         |
|------|-----------|----------|-----------|
| 1.Ti | 0.000000  | 0.000000 | 0.676990  |
| 2.C  | -0.725653 | 2.337510 | 0.168812  |
| 3.C  | 0.725653  | 2.337510 | 0.168812  |
| 4.C  | 1.171828  | 1.822074 | 1.443419  |
| 5.C  | 0.000000  | 1.571185 | 2.253082  |
| 6.C  | -1.171828 | 1.822074 | 1.443419  |
| 7.C  | 1.423800  | 2.726761 | -1.003854 |
| 8.C  | 0.707826  | 3.131310 | -2.123386 |
| 9.C  | -0.707826 | 3.131310 | -2.123386 |
| 10.C | -1.423800 | 2.726761 | -1.003854 |
| 11.H | 2.204086  | 1.771824 | 1.777569  |
| 12.H | 0.000000  | 1.328949 | 3.309104  |
| 13.H | -2.204086 | 1.771824 | 1.777569  |
| 14.H | 2.515386  | 2.730408 | -1.016459 |
| 15.H | 1.242750  | 3.445162 | -3.021583 |



|      |           |           |           |
|------|-----------|-----------|-----------|
| 16.H | -1.242750 | 3.445162  | -3.021583 |
| 17.H | -2.515386 | 2.730408  | -1.016459 |
| 18.C | -0.725653 | -2.337510 | 0.168812  |
| 19.C | -1.171828 | -1.822074 | 1.443419  |
| 20.C | 0.000000  | -1.571185 | 2.253082  |
| 21.C | 1.171828  | -1.822074 | 1.443419  |
| 22.C | 0.725653  | -2.337510 | 0.168812  |
| 23.C | -1.423800 | -2.726761 | -1.003854 |
| 24.C | -0.707826 | -3.131310 | -2.123386 |
| 25.C | 0.707826  | -3.131310 | -2.123386 |
| 26.C | 1.423800  | -2.726761 | -1.003854 |
| 27.H | 0.000000  | -1.328949 | 3.309104  |
| 28.H | 2.204086  | -1.771824 | 1.777569  |
| 29.H | -2.204086 | -1.771824 | 1.777569  |
| 30.H | -2.515386 | -2.730408 | -1.016459 |
| 31.H | -1.242750 | -3.445162 | -3.021583 |
| 32.H | 1.242750  | -3.445162 | -3.021583 |
| 33.H | 2.515386  | -2.730408 | -1.016459 |

**[Ti( $\eta^5$ -Ind)<sub>2</sub>] (C<sub>2v</sub>) S = 1, E<sub>T</sub> (BP86) = -208.399, E<sub>T</sub> (B3LYP/BP86) = -244.805.**

| Atom | X         | Y         | Z         |
|------|-----------|-----------|-----------|
| 1.Ti | 0.000000  | 0.000000  | 0.728952  |
| 2.C  | -0.725744 | 2.266372  | 0.166948  |
| 3.C  | 0.725744  | 2.266372  | 0.166948  |
| 4.C  | 1.162223  | 1.918949  | 1.493346  |
| 5.C  | 0.000000  | 1.760511  | 2.299456  |
| 6.C  | -1.162223 | 1.918949  | 1.493346  |
| 7.C  | 1.427381  | 2.497478  | -1.044711 |
| 8.C  | 0.708221  | 2.774518  | -2.200503 |
| 9.C  | -0.708221 | 2.774518  | -2.200503 |
| 10.C | -1.427381 | 2.497478  | -1.044711 |
| 11.H | 2.191003  | 1.877194  | 1.837789  |
| 12.H | 0.000000  | 1.538916  | 3.362782  |
| 13.H | -2.191003 | 1.877194  | 1.837789  |
| 14.H | 2.518607  | 2.488605  | -1.057109 |
| 15.H | 1.242139  | 2.980843  | -3.129680 |
| 16.H | -1.242139 | 2.980843  | -3.129680 |
| 17.H | -2.518607 | 2.488605  | -1.057109 |
| 18.C | -0.725744 | -2.266372 | 0.166948  |
| 19.C | -1.162223 | -1.918949 | 1.493346  |
| 20.C | 0.000000  | -1.760511 | 2.299456  |
| 21.C | 1.162223  | -1.918949 | 1.493346  |
| 22.C | 0.725744  | -2.266372 | 0.166948  |
| 23.C | -1.427381 | -2.497478 | -1.044711 |
| 24.C | -0.708221 | -2.774518 | -2.200503 |
| 25.C | 0.708221  | -2.774518 | -2.200503 |
| 26.C | 1.427381  | -2.497478 | -1.044711 |
| 27.H | 0.000000  | -1.538916 | 3.362782  |
| 28.H | 2.191003  | -1.877194 | 1.837789  |

|      |           |           |           |
|------|-----------|-----------|-----------|
| 29.H | -2.191003 | -1.877194 | 1.837789  |
| 30.H | -2.518607 | -2.488605 | -1.057109 |
| 31.H | -1.242139 | -2.980843 | -3.129680 |
| 32.H | 1.242139  | -2.980843 | -3.129680 |
| 33.H | 2.518607  | -2.488605 | -1.057109 |

**[Zr( $\eta^9$ -Ind)( $\eta^5$ -Ind)] (C<sub>7</sub>) S = 0, E<sub>T</sub> (BP86) = -208.552, E<sub>T</sub> (B3LYP/BP86) = -243.357.**

| Atom | X         | Y         | Z         |
|------|-----------|-----------|-----------|
| 1.Zr | -0.115404 | 0.388390  | -0.342475 |
| 2.C  | 1.152377  | 0.253051  | 1.947488  |
| 3.C  | 0.656907  | -1.090636 | 1.718991  |
| 4.C  | -0.783272 | -1.019801 | 1.682056  |
| 5.C  | -1.173012 | 0.321094  | 1.947895  |
| 6.C  | 0.007851  | 1.123364  | 2.044473  |
| 7.C  | 1.576858  | -2.162983 | 1.576525  |
| 8.C  | 2.935388  | -1.910372 | 1.686658  |
| 9.C  | 3.421579  | -0.595248 | 1.893307  |
| 10.C | 2.553888  | 0.482140  | 1.997507  |
| 11.H | -1.456796 | -1.866375 | 1.577272  |
| 12.H | -2.192537 | 0.669805  | 2.079239  |
| 13.H | 0.034762  | 2.186479  | 2.271916  |
| 14.H | 1.212452  | -3.179107 | 1.415545  |
| 15.H | 3.645371  | -2.734502 | 1.604198  |
| 16.H | 4.497267  | -0.429241 | 1.963405  |
| 17.H | 2.939129  | 1.489549  | 2.163816  |
| 18.C | 0.915639  | -0.462238 | -2.414098 |
| 19.C | 0.403704  | 0.898684  | -2.547872 |
| 20.C | -0.995695 | 1.193189  | -2.320323 |
| 21.C | -1.931234 | 0.136616  | -1.934173 |
| 22.C | -1.406628 | -1.192553 | -1.904135 |
| 23.C | -0.041675 | -1.477679 | -2.130740 |
| 24.C | -1.056522 | 2.472505  | -1.661866 |
| 25.C | 0.264018  | 2.965325  | -1.523939 |
| 26.C | 1.166237  | 2.010940  | -2.043166 |
| 27.H | 1.959806  | -0.693876 | -2.609109 |
| 28.H | -2.992831 | 0.338942  | -1.819723 |
| 29.H | -2.056076 | -2.008364 | -1.582939 |
| 30.H | 0.308428  | -2.497705 | -1.967611 |
| 31.H | -1.968047 | 2.972955  | -1.347389 |
| 32.H | 0.540272  | 3.918629  | -1.075499 |
| 33.H | 2.250235  | 2.081630  | -2.048880 |

**[Zr( $\eta^5$ -Ind)( $\eta^6$ -Ind)] (C<sub>7</sub>) S = 1, E<sub>T</sub> (BP86) = -208.018, E<sub>T</sub> (B3LYP/BP86) = -243.154.**

| Atom | X         | Y         | Z         |
|------|-----------|-----------|-----------|
| 1.Zr | -0.065161 | 0.005628  | -0.213621 |
| 2.C  | 1.110282  | 0.305941  | 2.019664  |
| 3.C  | 0.626819  | -1.064754 | 1.998169  |
| 4.C  | -0.809084 | -1.017290 | 2.002195  |
| 5.C  | -1.195082 | 0.350143  | 2.072298  |
| 6.C  | -0.037901 | 1.173196  | 2.044562  |
| 7.C  | 1.552042  | -2.131860 | 1.843288  |
| 8.C  | 2.913459  | -1.849242 | 1.798887  |

|      |           |           |           |
|------|-----------|-----------|-----------|
| 9.C  | 3.384132  | -0.515160 | 1.823925  |
| 10.C | 2.503926  | 0.559687  | 1.894273  |
| 11.H | -1.477826 | -1.873555 | 2.031359  |
| 12.H | -2.218584 | 0.711703  | 2.137901  |
| 13.H | -0.022824 | 2.257756  | 2.104124  |
| 14.H | 1.195602  | -3.162554 | 1.803023  |
| 15.H | 3.629906  | -2.667200 | 1.714417  |
| 16.H | 4.456496  | -0.326830 | 1.760773  |
| 17.H | 2.876552  | 1.585055  | 1.889079  |
| 18.C | 0.845915  | -0.266853 | -2.620872 |
| 19.C | 0.453813  | 1.094773  | -2.439138 |
| 20.C | -0.951988 | 1.411086  | -2.123963 |
| 21.C | -1.890533 | 0.347763  | -1.968908 |
| 22.C | -1.464458 | -0.986510 | -2.146799 |
| 23.C | -0.111217 | -1.288079 | -2.481006 |
| 24.C | -1.029847 | 2.818961  | -1.930600 |
| 25.C | 0.256290  | 3.355019  | -2.119084 |
| 26.C | 1.175202  | 2.314901  | -2.392582 |
| 27.H | 1.880567  | -0.518239 | -2.856497 |
| 28.H | -2.931395 | 0.559642  | -1.721966 |
| 29.H | -2.177816 | -1.801805 | -2.029179 |
| 30.H | 0.186495  | -2.328598 | -2.606460 |
| 31.H | -1.931665 | 3.376131  | -1.688320 |
| 32.H | 0.515602  | 4.408036  | -2.027616 |
| 33.H | 2.242770  | 2.426699  | -2.566628 |

**[Zr( $\eta^9$ -Ind)( $\eta^6$ -Ind)] ( $C_3$ ) S = 0, E<sub>T</sub> (BP86) = -208.275, E<sub>T</sub> (B3LYP/BP86) = -243.450.**

| Atom | X         | Y         | Z         |
|------|-----------|-----------|-----------|
| 1.Zr | 0.370267  | 0.434107  | 0.000000  |
| 2.C  | -2.161973 | 0.231578  | 0.726280  |
| 3.C  | -2.161973 | 0.231578  | -0.726280 |
| 4.C  | -1.631874 | 1.489840  | -1.169762 |
| 5.C  | -1.358195 | 2.260518  | 0.000000  |
| 6.C  | -1.631874 | 1.489840  | 1.169762  |
| 7.C  | -2.661768 | -0.901449 | -1.427960 |
| 8.C  | -3.164493 | -1.970022 | -0.712639 |
| 9.C  | -3.164493 | -1.970022 | 0.712639  |
| 10.C | -2.661768 | -0.901449 | 1.427960  |
| 11.H | -1.573253 | 1.834592  | -2.196689 |
| 12.H | -0.998312 | 3.286095  | 0.000000  |
| 13.H | -1.573253 | 1.834592  | 2.196689  |
| 14.H | -2.674476 | -0.905737 | -2.518451 |
| 15.H | -3.575449 | -2.829389 | -1.243384 |
| 16.H | -3.575449 | -2.829389 | 1.243384  |
| 17.H | -2.674476 | -0.905737 | 2.518451  |
| 18.C | 2.440960  | -0.331840 | 0.723801  |
| 19.C | 2.247610  | 0.907215  | 1.473347  |
| 20.C | 2.176587  | 2.107980  | 0.705864  |
| 21.C | 2.176587  | 2.107980  | -0.705864 |
| 22.C | 2.247610  | 0.907215  | -1.473347 |
| 23.C | 2.440960  | -0.331840 | -0.723801 |
| 24.C | 1.800845  | -1.546147 | 1.149735  |
| 25.C | 1.437311  | -2.283106 | 0.000000  |
| 26.C | 1.800845  | -1.546147 | -1.149735 |

|      |          |           |           |
|------|----------|-----------|-----------|
| 27.H | 2.294534 | 0.922659  | 2.558787  |
| 28.H | 1.993988 | 3.051831  | -1.221341 |
| 29.H | 2.294534 | 0.922659  | -2.558787 |
| 30.H | 1.993988 | 3.051831  | 1.221341  |
| 31.H | 1.632954 | -1.837107 | 2.183171  |
| 32.H | 0.942988 | -3.253303 | 0.000000  |
| 33.H | 1.632954 | -1.837107 | -2.183171 |

**[Zr( $\eta^5$ -Ind)( $\eta^6$ -Ind)] ( $C_s$ ) S = 1,  $E_T$  (BP86) = -207.863,  $E_T$  (B3LYP/BP86) = -243.201.**

| Atom | X         | Y         | Z         |
|------|-----------|-----------|-----------|
| 1.Zr | -0.207647 | 0.529704  | 0.000000  |
| 2.C  | 2.254738  | 0.531745  | 0.725952  |
| 3.C  | 2.254738  | 0.531745  | -0.725952 |
| 4.C  | 2.699225  | -0.619776 | -1.427223 |
| 5.C  | 3.196102  | -1.702422 | -0.706060 |
| 6.C  | 3.196102  | -1.702422 | 0.706060  |
| 7.C  | 2.699225  | -0.619776 | 1.427223  |
| 8.C  | 1.665058  | 1.772427  | -1.160819 |
| 9.C  | 1.355508  | 2.533399  | 0.000000  |
| 10.C | 1.665058  | 1.772427  | 1.160819  |
| 11.H | 2.688233  | -0.635729 | -2.518280 |
| 12.H | 3.571654  | -2.576695 | -1.238981 |
| 13.H | 3.571654  | -2.576695 | 1.238981  |
| 14.H | 2.688233  | -0.635729 | 2.518280  |
| 15.H | 1.564827  | 2.106994  | -2.189713 |
| 16.H | 0.947167  | 3.541273  | 0.000000  |
| 17.H | 1.564827  | 2.106994  | 2.189713  |
| 18.C | -2.499205 | 1.452425  | 0.713673  |
| 19.C | -2.325691 | 0.257962  | 1.441075  |
| 20.C | -2.161636 | -0.971769 | 0.738345  |
| 21.C | -2.161636 | -0.971769 | -0.738345 |
| 22.C | -2.325691 | 0.257962  | -1.441075 |
| 23.C | -2.499205 | 1.452425  | -0.713673 |
| 24.C | -1.907058 | -2.303336 | -1.155070 |
| 25.C | -1.779382 | -3.102536 | 0.000000  |
| 26.C | -1.907058 | -2.303336 | 1.155070  |
| 27.H | -2.626622 | 2.395366  | 1.244382  |
| 28.H | -2.626622 | 2.395366  | -1.244382 |
| 29.H | -2.332009 | 0.276900  | -2.531421 |
| 30.H | -2.332009 | 0.276900  | 2.531421  |
| 31.H | -1.837320 | -2.644318 | -2.185171 |
| 32.H | -1.579299 | -4.171869 | 0.000000  |
| 33.H | -1.837320 | -2.644318 | 2.185171  |

**[Zr( $\eta^5$ -Ind)<sub>2</sub>] ( $C_{2v}$ ) S = 0,  $E_T$  (BP86) = -208.023,  $E_T$  (B3LYP/BP86) = -243.075.**

| Atom | X         | Y        | Z        |
|------|-----------|----------|----------|
| 1.Zr | 0.000000  | 0.000000 | 0.659953 |
| 2.C  | -0.726126 | 2.451761 | 0.181191 |
| 3.C  | 0.726126  | 2.451761 | 0.181191 |
| 4.C  | 1.173016  | 1.981421 | 1.472515 |
| 5.C  | 0.000000  | 1.744068 | 2.284688 |

|      |           |           |           |
|------|-----------|-----------|-----------|
| 6.C  | -1.173016 | 1.981421  | 1.472515  |
| 7.C  | 1.421840  | 2.772496  | -1.013536 |
| 8.C  | 0.706633  | 3.123442  | -2.154722 |
| 9.C  | -0.706633 | 3.123442  | -2.154722 |
| 10.C | -1.421840 | 2.772496  | -1.013536 |
| 11.H | 2.202331  | 1.974284  | 1.820146  |
| 12.H | 0.000000  | 1.554006  | 3.353520  |
| 13.H | -2.202331 | 1.974284  | 1.820146  |
| 14.H | 2.513610  | 2.771767  | -1.027251 |
| 15.H | 1.242739  | 3.389568  | -3.066543 |
| 16.H | -1.242739 | 3.389568  | -3.066543 |
| 17.H | -2.513610 | 2.771767  | -1.027251 |
| 18.C | -0.726126 | -2.451761 | 0.181191  |
| 19.C | -1.173016 | -1.981421 | 1.472515  |
| 20.C | 0.000000  | -1.744068 | 2.284688  |
| 21.C | 1.173016  | -1.981421 | 1.472515  |
| 22.C | 0.726126  | -2.451761 | 0.181191  |
| 23.C | -1.421840 | -2.772496 | -1.013536 |
| 24.C | -0.706633 | -3.123442 | -2.154722 |
| 25.C | 0.706633  | -3.123442 | -2.154722 |
| 26.C | 1.421840  | -2.772496 | -1.013536 |
| 27.H | 0.000000  | -1.554006 | 3.353520  |
| 28.H | 2.202331  | -1.974284 | 1.820146  |
| 29.H | -2.202331 | -1.974284 | 1.820146  |
| 30.H | -2.513610 | -2.771767 | -1.027251 |
| 31.H | -1.242739 | -3.389568 | -3.066543 |
| 32.H | 1.242739  | -3.389568 | -3.066543 |
| 33.H | 2.513610  | -2.771767 | -1.027251 |

**[Zr( $\eta^5$ -Ind)<sub>2</sub>] (C<sub>2v</sub>) S = 1, E<sub>T</sub> (BP86) = -208.335, E<sub>T</sub> (B3LYP/BP86) = -243.500.**

| Atom | X         | Y         | Z         |
|------|-----------|-----------|-----------|
| 1.Zr | 0.000000  | 0.000000  | 0.723608  |
| 2.C  | -0.725133 | 2.407631  | 0.159359  |
| 3.C  | 0.725133  | 2.407631  | 0.159359  |
| 4.C  | 1.164147  | 2.099355  | 1.496151  |
| 5.C  | 0.000000  | 1.962570  | 2.307844  |
| 6.C  | -1.164147 | 2.099355  | 1.496151  |
| 7.C  | 1.425654  | 2.583449  | -1.062680 |
| 8.C  | 0.706397  | 2.828460  | -2.229192 |
| 9.C  | -0.706397 | 2.828460  | -2.229192 |
| 10.C | -1.425654 | 2.583449  | -1.062680 |
| 11.H | 2.192667  | 2.090165  | 1.845523  |
| 12.H | 0.000000  | 1.793079  | 3.381794  |
| 13.H | -2.192667 | 2.090165  | 1.845523  |
| 14.H | 2.516822  | 2.570354  | -1.076163 |
| 15.H | 1.240910  | 3.000356  | -3.164237 |
| 16.H | -1.240910 | 3.000356  | -3.164237 |
| 17.H | -2.516822 | 2.570354  | -1.076163 |
| 18.C | -0.725133 | -2.407631 | 0.159359  |
| 19.C | -1.164147 | -2.099355 | 1.496151  |
| 20.C | 0.000000  | -1.962570 | 2.307844  |

|      |           |           |           |
|------|-----------|-----------|-----------|
| 21.C | 1.164147  | -2.099355 | 1.496151  |
| 22.C | 0.725133  | -2.407631 | 0.159359  |
| 23.C | -1.425654 | -2.583449 | -1.062680 |
| 24.C | -0.706397 | -2.828460 | -2.229192 |
| 25.C | 0.706397  | -2.828460 | -2.229192 |
| 26.C | 1.425654  | -2.583449 | -1.062680 |
| 27.H | 0.000000  | -1.793079 | 3.381794  |
| 28.H | 2.192667  | -2.090165 | 1.845523  |
| 29.H | -2.192667 | -2.090165 | 1.845523  |
| 30.H | -2.516822 | -2.570354 | -1.076163 |
| 31.H | -1.240910 | -3.000356 | -3.164237 |
| 32.H | 1.240910  | -3.000356 | -3.164237 |
| 33.H | 2.516822  | -2.570354 | -1.076163 |

### Compounds for TNE = 23

**[V( $\eta^5$ -Ind)<sub>2</sub>] (C<sub>2v</sub>) S = 1/2, E<sub>T</sub> (BP86) = -209.610, E<sub>T</sub> (B3LYP/BP86) = -246.208.**

| Atom | X         | Y         | Z         |
|------|-----------|-----------|-----------|
| 1.V  | 0.000000  | 0.000000  | 0.560554  |
| 2.C  | -0.722606 | 2.181910  | -0.090469 |
| 3.C  | 0.722606  | 2.181910  | -0.090469 |
| 4.C  | 1.168242  | 1.761465  | 1.220550  |
| 5.C  | 0.000000  | 1.579387  | 2.041622  |
| 6.C  | -1.168242 | 1.761465  | 1.220550  |
| 7.C  | 1.422055  | 2.464585  | -1.290327 |
| 8.C  | 0.705983  | 2.787788  | -2.437657 |
| 9.C  | -0.705983 | 2.787788  | -2.437657 |
| 10.C | -1.422055 | 2.464585  | -1.290327 |
| 11.H | 2.200607  | 1.725828  | 1.557815  |
| 12.H | 0.000000  | 1.390358  | 3.110371  |
| 13.H | -2.200607 | 1.725828  | 1.557815  |
| 14.H | 2.513505  | 2.458041  | -1.303079 |
| 15.H | 1.241247  | 3.030449  | -3.356726 |
| 16.H | -1.241247 | 3.030449  | -3.356726 |
| 17.H | -2.513505 | 2.458041  | -1.303079 |
| 18.C | -0.722606 | -2.181910 | -0.090469 |
| 19.C | -1.168242 | -1.761465 | 1.220550  |
| 20.C | 0.000000  | -1.579387 | 2.041622  |
| 21.C | 1.168242  | -1.761465 | 1.220550  |
| 22.C | 0.722606  | -2.181910 | -0.090469 |
| 23.C | -1.422055 | -2.464585 | -1.290327 |
| 24.C | -0.705983 | -2.787788 | -2.437657 |
| 25.C | 0.705983  | -2.787788 | -2.437657 |
| 26.C | 1.422055  | -2.464585 | -1.290327 |
| 27.H | 0.000000  | -1.390358 | 3.110371  |
| 28.H | 2.200607  | -1.725828 | 1.557815  |
| 29.H | -2.200607 | -1.725828 | 1.557815  |
| 30.H | -2.513505 | -2.458041 | -1.303079 |
| 31.H | -1.241247 | -3.030449 | -3.356726 |
| 32.H | 1.241247  | -3.030449 | -3.356726 |
| 33.H | 2.513505  | -2.458041 | -1.303079 |

**[V( $\eta^5$ -Ind)<sub>2</sub>] (C<sub>2v</sub>) S = 3/2, E<sub>T</sub> (BP86) = -209.730, E<sub>T</sub> (B3LYP/BP86) = -247.061.**

| Atom | X         | Y         | Z         |
|------|-----------|-----------|-----------|
| 1.V  | 0.000000  | 0.000000  | 0.799282  |
| 2.C  | -0.728202 | 2.041935  | -0.140436 |
| 3.C  | 0.728202  | 2.041935  | -0.140436 |
| 4.C  | 1.162617  | 1.949666  | 1.227962  |
| 5.C  | 0.000000  | 1.939255  | 2.052636  |
| 6.C  | -1.162617 | 1.949666  | 1.227962  |
| 7.C  | 1.430029  | 2.116778  | -1.378294 |
| 8.C  | 0.712937  | 2.204659  | -2.553621 |
| 9.C  | -0.712937 | 2.204659  | -2.553621 |
| 10.C | -1.430029 | 2.116778  | -1.378294 |
| 11.H | 2.192218  | 1.956261  | 1.575447  |
| 12.H | 0.000000  | 1.907683  | 3.139493  |
| 13.H | -2.192218 | 1.956261  | 1.575447  |
| 14.H | 2.521366  | 2.127763  | -1.388608 |
| 15.H | 1.242456  | 2.276336  | -3.504433 |
| 16.H | -1.242456 | 2.276336  | -3.504433 |
| 17.H | -2.521366 | 2.127763  | -1.388608 |
| 18.C | -0.728202 | -2.041935 | -0.140436 |
| 19.C | -1.162617 | -1.949666 | 1.227962  |
| 20.C | 0.000000  | -1.939255 | 2.052636  |
| 21.C | 1.162617  | -1.949666 | 1.227962  |
| 22.C | 0.728202  | -2.041935 | -0.140436 |
| 23.C | -1.430029 | -2.116778 | -1.378294 |
| 24.C | -0.712937 | -2.204659 | -2.553621 |
| 25.C | 0.712937  | -2.204659 | -2.553621 |
| 26.C | 1.430029  | -2.116778 | -1.378294 |
| 27.H | 0.000000  | -1.907683 | 3.139493  |
| 28.H | 2.192218  | -1.956261 | 1.575447  |
| 29.H | -2.192218 | -1.956261 | 1.575447  |
| 30.H | -2.521366 | -2.127763 | -1.388608 |
| 31.H | -1.242456 | -2.276336 | -3.504433 |
| 32.H | 1.242456  | -2.276336 | -3.504433 |
| 33.H | 2.521366  | -2.127763 | -1.388608 |

$[V(\eta^6\text{-Ind})_2] (C_{2v}) S = 3/2, E_T (\text{BP86}) = -208.520, E_T (\text{B3LYP/BP86}) = -245.817.$

| Atom | X         | Y         | Z         |
|------|-----------|-----------|-----------|
| 1.V  | 0.000000  | 0.000000  | 0.787031  |
| 2.C  | 0.746130  | -2.028635 | -0.469030 |
| 3.C  | -0.746130 | -2.028635 | -0.469030 |
| 4.C  | -1.433907 | -1.905029 | 0.761104  |
| 5.C  | -0.716577 | -1.810679 | 1.975688  |
| 6.C  | 0.716577  | -1.810679 | 1.975688  |
| 7.C  | 1.433907  | -1.905029 | 0.761104  |
| 8.C  | -1.161490 | -2.152454 | -1.812506 |
| 9.C  | 0.000000  | -2.239553 | -2.606859 |
| 10.C | 1.161490  | -2.152454 | -1.812506 |
| 11.H | -2.524189 | -1.876371 | 0.778907  |
| 12.H | -1.254337 | -1.723995 | 2.918675  |
| 13.H | 1.254337  | -1.723995 | 2.918675  |
| 14.H | 2.524189  | -1.876371 | 0.778907  |
| 15.H | -2.188339 | -2.179874 | -2.165286 |
| 16.H | 0.000000  | -2.354046 | -3.689344 |

|      |           |           |           |
|------|-----------|-----------|-----------|
| 17.H | 2.188339  | -2.179874 | -2.165286 |
| 18.C | 0.746130  | 2.028635  | -0.469030 |
| 19.C | 1.433907  | 1.905029  | 0.761104  |
| 20.C | 0.716577  | 1.810679  | 1.975688  |
| 21.C | -0.716577 | 1.810679  | 1.975688  |
| 22.C | -1.433907 | 1.905029  | 0.761104  |
| 23.C | -0.746130 | 2.028635  | -0.469030 |
| 24.C | 1.161490  | 2.152454  | -1.812506 |
| 25.C | 0.000000  | 2.239553  | -2.606859 |
| 26.C | -1.161490 | 2.152454  | -1.812506 |
| 27.H | 1.254337  | 1.723995  | 2.918675  |
| 28.H | -1.254337 | 1.723995  | 2.918675  |
| 29.H | -2.524189 | 1.876371  | 0.778907  |
| 30.H | 2.524189  | 1.876371  | 0.778907  |
| 31.H | 2.188339  | 2.179874  | -2.165286 |
| 32.H | 0.000000  | 2.354046  | -3.689344 |
| 33.H | -2.188339 | 2.179874  | -2.165286 |

**[V( $\eta^6$ -Ind)<sub>2</sub>] (C<sub>2</sub>h) S = 1/2, E<sub>T</sub> (BP86) = -208.779, E<sub>T</sub> (B3LYP/BP86) = -245.553.**

| Atom | X         | Y         | Z         |
|------|-----------|-----------|-----------|
| 1.V  | 0.000000  | 0.000000  | 0.000000  |
| 2.C  | 1.953115  | 0.985917  | -0.733391 |
| 3.C  | 1.953115  | 0.985917  | 0.733391  |
| 4.C  | 0.838867  | 1.543035  | 1.442059  |
| 5.C  | -0.195422 | 2.177023  | 0.711265  |
| 6.C  | -0.195422 | 2.177023  | -0.711265 |
| 7.C  | 0.838867  | 1.543035  | -1.442059 |
| 8.C  | 3.141148  | 0.320221  | 1.153093  |
| 9.C  | 3.859954  | -0.047353 | 0.000000  |
| 10.C | 3.141148  | 0.320221  | -1.153093 |
| 11.H | 0.801513  | 1.512618  | 2.530791  |
| 12.H | -1.054605 | 2.590210  | 1.238585  |
| 13.H | -1.054605 | 2.590210  | -1.238585 |
| 14.H | 0.801513  | 1.512618  | -2.530791 |
| 15.H | 3.437142  | 0.142150  | 2.184413  |
| 16.H | 4.817750  | -0.564275 | 0.000000  |
| 17.H | 3.437142  | 0.142150  | -2.184413 |
| 18.C | 0.195422  | -2.177023 | -0.711265 |
| 19.C | -0.838867 | -1.543035 | -1.442059 |
| 20.C | -1.953115 | -0.985917 | -0.733391 |
| 21.C | -1.953115 | -0.985917 | 0.733391  |
| 22.C | -0.838867 | -1.543035 | 1.442059  |
| 23.C | 0.195422  | -2.177023 | 0.711265  |
| 24.C | -3.141148 | -0.320221 | 1.153093  |
| 25.C | -3.859954 | 0.047353  | 0.000000  |
| 26.C | -3.141148 | -0.320221 | -1.153093 |
| 27.H | 1.054605  | -2.590210 | -1.238585 |
| 28.H | 1.054605  | -2.590210 | 1.238585  |
| 29.H | -0.801513 | -1.512618 | 2.530791  |
| 30.H | -0.801513 | -1.512618 | -2.530791 |
| 31.H | -3.437142 | -0.142150 | 2.184413  |
| 32.H | -4.817750 | 0.564275  | 0.000000  |
| 33.H | -3.437142 | -0.142150 | -2.184413 |



**[V( $\eta^5$ -Ind)( $\eta^6$ -Ind)] ( $C_5$ ) S = 1/2, E<sub>T</sub> (BP86) = -209.120, E<sub>T</sub> (B3LYP/BP86) = -245.922.**

| Atom | X         | Y         | Z         |
|------|-----------|-----------|-----------|
| 1.V  | 0.277254  | 0.712160  | 0.000000  |
| 2.C  | -1.986175 | 0.260950  | 0.724319  |
| 3.C  | -1.986175 | 0.260950  | -0.724319 |
| 4.C  | -1.478183 | 1.539588  | -1.165141 |
| 5.C  | -1.244346 | 2.336843  | 0.000000  |
| 6.C  | -1.478183 | 1.539588  | 1.165141  |
| 7.C  | -2.416466 | -0.894323 | -1.426351 |
| 8.C  | -2.857914 | -1.993548 | -0.709066 |
| 9.C  | -2.857914 | -1.993548 | 0.709066  |
| 10.C | -2.416466 | -0.894323 | 1.426351  |
| 11.H | -1.414902 | 1.878079  | -2.195664 |
| 12.H | -0.935142 | 3.378718  | 0.000000  |
| 13.H | -1.414902 | 1.878079  | 2.195664  |
| 14.H | -2.421815 | -0.903754 | -2.517723 |
| 15.H | -3.209931 | -2.878858 | -1.240633 |
| 16.H | -3.209931 | -2.878858 | 1.240633  |
| 17.H | -2.421815 | -0.903754 | 2.517723  |
| 18.C | 1.999194  | -0.583844 | 0.729458  |
| 19.C | 1.966262  | 0.665685  | 1.447105  |
| 20.C | 2.103266  | 1.872896  | 0.709911  |
| 21.C | 2.103266  | 1.872896  | -0.709911 |
| 22.C | 1.966262  | 0.665685  | -1.447105 |
| 23.C | 1.999194  | -0.583844 | -0.729458 |
| 24.C | 1.848203  | -1.938748 | 1.148197  |
| 25.C | 1.795548  | -2.751448 | 0.000000  |
| 26.C | 1.848203  | -1.938748 | -1.148197 |
| 27.H | 1.921274  | 0.685894  | 2.535298  |
| 28.H | 2.094103  | 2.827491  | -1.236353 |
| 29.H | 1.921274  | 0.685894  | -2.535298 |
| 30.H | 2.094103  | 2.827491  | 1.236353  |
| 31.H | 1.790602  | -2.277979 | 2.180352  |
| 32.H | 1.680090  | -3.833442 | 0.000000  |
| 33.H | 1.790602  | -2.277979 | -2.180352 |

**[V( $\eta^5$ -Ind)( $\eta^6$ -Ind)] ( $C_I$ ) S = 3/2, E<sub>T</sub> (BP86) = -209.295, E<sub>T</sub> (B3LYP/BP86) = -246.504.**

| Atom | X         | Y         | Z         |
|------|-----------|-----------|-----------|
| 1.V  | -0.058094 | -0.057796 | -0.074262 |
| 2.C  | 1.138252  | 0.022742  | 1.969717  |
| 3.C  | 0.270992  | -1.145452 | 1.998419  |
| 4.C  | -1.087018 | -0.679500 | 1.881164  |
| 5.C  | -1.054173 | 0.746160  | 1.835778  |
| 6.C  | 0.299653  | 1.183894  | 1.836281  |
| 7.C  | 0.844579  | -2.443550 | 2.119242  |
| 8.C  | 2.216347  | -2.564480 | 2.230526  |
| 9.C  | 3.066448  | -1.420646 | 2.196653  |
| 10.C | 2.550012  | -0.147073 | 2.055511  |
| 11.H | -1.979829 | -1.299144 | 1.901147  |
| 12.H | -1.922951 | 1.395731  | 1.766860  |

|      |           |           |           |
|------|-----------|-----------|-----------|
| 13.H | 0.637663  | 2.215241  | 1.783462  |
| 14.H | 0.202259  | -3.325313 | 2.152956  |
| 15.H | 2.662558  | -3.553066 | 2.347989  |
| 16.H | 4.144713  | -1.558640 | 2.287884  |
| 17.H | 3.206765  | 0.724225  | 2.040359  |
| 18.C | 1.361208  | 0.018107  | -1.974446 |
| 19.C | 0.657069  | 1.250240  | -2.000408 |
| 20.C | -0.831189 | 1.234215  | -1.984605 |
| 21.C | -1.508831 | -0.014612 | -1.941830 |
| 22.C | -0.776359 | -1.222952 | -1.941504 |
| 23.C | 0.654500  | -1.205410 | -1.952835 |
| 24.C | -1.262377 | 2.583155  | -1.996987 |
| 25.C | -0.109943 | 3.395205  | -2.034059 |
| 26.C | 1.059046  | 2.609132  | -2.022028 |
| 27.H | 2.452118  | 0.008311  | -1.952864 |
| 28.H | -2.598988 | -0.046735 | -1.903197 |
| 29.H | -1.301101 | -2.176697 | -1.907679 |
| 30.H | 1.202359  | -2.146159 | -1.919083 |
| 31.H | -2.294595 | 2.924311  | -1.999189 |
| 32.H | -0.121732 | 4.483639  | -2.069244 |
| 33.H | 2.083902  | 2.971429  | -2.045083 |

**[Nb( $\eta^5$ -Ind)<sub>2</sub>] (C<sub>2v</sub>) S = 1/2, E<sub>T</sub> (BP86) = -209.525, E<sub>T</sub> (B3LYP/BP86) = -245.962.**

| Atom | X         | Y         | Z         |
|------|-----------|-----------|-----------|
| 1.Nb | 0.046937  | 0.003657  | 0.543613  |
| 2.C  | -0.740025 | 2.355919  | 0.013643  |
| 3.C  | 0.707148  | 2.397576  | 0.036576  |
| 4.C  | 1.146267  | 1.941693  | 1.338174  |
| 5.C  | -0.027366 | 1.690334  | 2.132063  |
| 6.C  | -1.189388 | 1.868267  | 1.300077  |
| 7.C  | 1.415037  | 2.725279  | -1.143671 |
| 8.C  | 0.702336  | 3.079533  | -2.289992 |
| 9.C  | -0.705370 | 3.040585  | -2.311370 |
| 10.C | -1.430000 | 2.643069  | -1.187338 |
| 11.H | 2.169759  | 1.954342  | 1.701751  |
| 12.H | -0.036375 | 1.491874  | 3.200245  |
| 13.H | -2.223162 | 1.817360  | 1.630470  |
| 14.H | 2.506272  | 2.739790  | -1.142121 |
| 15.H | 1.244366  | 3.369477  | -3.190177 |
| 16.H | -1.235890 | 3.298591  | -3.228483 |
| 17.H | -2.519687 | 2.594111  | -1.219498 |
| 18.C | -0.715658 | -2.365259 | 0.043366  |
| 19.C | -1.161774 | -1.868349 | 1.327777  |
| 20.C | 0.004003  | -1.664498 | 2.148910  |
| 21.C | 1.175512  | -1.910156 | 1.349262  |
| 22.C | 0.732423  | -2.385429 | 0.055230  |
| 23.C | -1.408965 | -2.678268 | -1.149469 |
| 24.C | -0.685946 | -3.072153 | -2.275880 |
| 25.C | 0.722322  | -3.086001 | -2.265738 |
| 26.C | 1.437264  | -2.709026 | -1.128969 |
| 27.H | -0.002112 | -1.456737 | 3.214989  |
| 28.H | 2.201573  | -1.908901 | 1.705695  |
| 29.H | -2.192992 | -1.827002 | 1.666632  |

|      |           |           |           |
|------|-----------|-----------|-----------|
| 30.H | -2.499507 | -2.649207 | -1.174554 |
| 31.H | -1.218135 | -3.348531 | -3.185849 |
| 32.H | 1.262443  | -3.373409 | -3.168269 |
| 33.H | 2.528605  | -2.704179 | -1.136082 |

**[Nb( $\eta^5$ -Ind)<sub>2</sub>] (C<sub>2v</sub>) S = 3/2, E<sub>T</sub> (BP86) = -209.807, E<sub>T</sub> (B3LYP/BP86) = -246.786.**

| Atom | X         | Y         | Z         |
|------|-----------|-----------|-----------|
| 1.Nb | 0.010890  | 0.003957  | 0.787006  |
| 2.C  | -0.748289 | 2.274763  | -0.005128 |
| 3.C  | 0.707202  | 2.305361  | 0.031155  |
| 4.C  | 1.112106  | 2.108278  | 1.397372  |
| 5.C  | -0.069235 | 2.007604  | 2.188622  |
| 6.C  | -1.212186 | 2.060804  | 1.339101  |
| 7.C  | 1.435738  | 2.516707  | -1.173931 |
| 8.C  | 0.743128  | 2.722818  | -2.351708 |
| 9.C  | -0.681671 | 2.693556  | -2.386949 |
| 10.C | -1.423593 | 2.457869  | -1.245587 |
| 11.H | 2.131520  | 2.125165  | 1.773150  |
| 12.H | -0.094064 | 1.899761  | 3.270212  |
| 13.H | -2.249106 | 2.031872  | 1.662769  |
| 14.H | 2.526518  | 2.544067  | -1.155407 |
| 15.H | 1.292595  | 2.907158  | -3.275454 |
| 16.H | -1.192244 | 2.856783  | -3.336670 |
| 17.H | -2.513988 | 2.440273  | -1.282306 |
| 18.C | -0.711317 | -2.293317 | 0.052119  |
| 19.C | -1.134049 | -2.072226 | 1.409074  |
| 20.C | 0.036287  | -1.981246 | 2.217950  |
| 21.C | 1.191345  | -2.065995 | 1.387762  |
| 22.C | 0.744845  | -2.289161 | 0.039214  |
| 23.C | -1.423889 | -2.502282 | -1.162966 |
| 24.C | -0.715886 | -2.729683 | -2.327411 |
| 25.C | 0.709480  | -2.726364 | -2.339713 |
| 26.C | 1.436816  | -2.495489 | -1.187987 |
| 27.H | 0.046300  | -1.857516 | 3.298122  |
| 28.H | 2.223396  | -2.051619 | 1.727646  |
| 29.H | -2.159425 | -2.063583 | 1.768412  |
| 30.H | -2.515084 | -2.509873 | -1.162402 |
| 31.H | -1.254151 | -2.910565 | -3.258558 |
| 32.H | 1.232132  | -2.905492 | -3.279929 |
| 33.H | 2.527791  | -2.498033 | -1.206566 |

**[Nb( $\eta^5$ -Ind)( $\eta^6$ -Ind)] (C<sub>s</sub>) S = 1/2, E<sub>T</sub> (BP86) = -209.460, E<sub>T</sub> (B3LYP/BP86) = -246.293.**

| Atom | X         | Y         | Z         |
|------|-----------|-----------|-----------|
| 1.Nb | 0.257380  | 0.676469  | 0.000000  |
| 2.C  | -2.143800 | 0.290116  | 0.724712  |
| 3.C  | -2.143800 | 0.290116  | -0.724712 |
| 4.C  | -1.664079 | 1.579283  | -1.165894 |
| 5.C  | -1.441429 | 2.375336  | 0.000000  |
| 6.C  | -1.664079 | 1.579283  | 1.165894  |
| 7.C  | -2.538203 | -0.878533 | -1.426529 |
| 8.C  | -2.963071 | -1.987944 | -0.707920 |
| 9.C  | -2.963071 | -1.987944 | 0.707920  |

|      |           |           |           |
|------|-----------|-----------|-----------|
| 10.C | -2.538203 | -0.878533 | 1.426529  |
| 11.H | -1.621929 | 1.925113  | -2.194334 |
| 12.H | -1.152564 | 3.423052  | 0.000000  |
| 13.H | -1.621929 | 1.925113  | 2.194334  |
| 14.H | -2.536158 | -0.891268 | -2.517506 |
| 15.H | -3.293781 | -2.880744 | -1.240500 |
| 16.H | -3.293781 | -2.880744 | 1.240500  |
| 17.H | -2.536158 | -0.891268 | 2.517506  |
| 18.C | 2.154164  | -0.611276 | 0.728412  |
| 19.C | 2.122301  | 0.635250  | 1.454349  |
| 20.C | 2.250272  | 1.841358  | 0.710799  |
| 21.C | 2.250272  | 1.841358  | -0.710799 |
| 22.C | 2.122301  | 0.635250  | -1.454349 |
| 23.C | 2.154164  | -0.611276 | -0.728412 |
| 24.C | 1.996874  | -1.966081 | 1.147712  |
| 25.C | 1.944337  | -2.781392 | 0.000000  |
| 26.C | 1.996874  | -1.966081 | -1.147712 |
| 27.H | 2.123702  | 0.654318  | 2.542693  |
| 28.H | 2.260392  | 2.796321  | -1.236186 |
| 29.H | 2.123702  | 0.654318  | -2.542693 |
| 30.H | 2.260392  | 2.796321  | 1.236186  |
| 31.H | 1.941802  | -2.304459 | 2.179968  |
| 32.H | 1.826372  | -3.862723 | 0.000000  |
| 33.H | 1.941802  | -2.304459 | -2.179968 |

**[Nb( $\eta^6$ -Ind)<sub>2</sub>] (C<sub>2v</sub>) S = 1/2, E<sub>T</sub> (BP86) = -209.169, E<sub>T</sub> (B3LYP/BP86) = -245.919**

| Atom | X         | Y         | Z         |
|------|-----------|-----------|-----------|
| 1.Nb | 0.000000  | 0.000000  | 0.670526  |
| 2.C  | 0.733629  | -2.105818 | -0.416527 |
| 3.C  | -0.733629 | -2.105818 | -0.416527 |
| 4.C  | -1.447183 | -1.948565 | 0.816573  |
| 5.C  | -0.713544 | -1.891123 | 2.026099  |
| 6.C  | 0.713544  | -1.891123 | 2.026099  |
| 7.C  | 1.447183  | -1.948565 | 0.816573  |
| 8.C  | -1.151937 | -2.200987 | -1.771458 |
| 9.C  | 0.000000  | -2.282132 | -2.578023 |
| 10.C | 1.151937  | -2.200987 | -1.771458 |
| 11.H | -2.536516 | -1.941328 | 0.836211  |
| 12.H | -1.240795 | -1.794990 | 2.975131  |
| 13.H | 1.240795  | -1.794990 | 2.975131  |
| 14.H | 2.536516  | -1.941328 | 0.836211  |
| 15.H | -2.182639 | -2.203614 | -2.117454 |
| 16.H | 0.000000  | -2.357643 | -3.663295 |
| 17.H | 2.182639  | -2.203614 | -2.117454 |
| 18.C | 0.733629  | 2.105818  | -0.416527 |
| 19.C | 1.447183  | 1.948565  | 0.816573  |
| 20.C | 0.713544  | 1.891123  | 2.026099  |
| 21.C | -0.713544 | 1.891123  | 2.026099  |
| 22.C | -1.447183 | 1.948565  | 0.816573  |
| 23.C | -0.733629 | 2.105818  | -0.416527 |
| 24.C | 1.151937  | 2.200987  | -1.771458 |
| 25.C | 0.000000  | 2.282132  | -2.578023 |
| 26.C | -1.151937 | 2.200987  | -1.771458 |
| 27.H | 1.240795  | 1.794990  | 2.975131  |

|      |           |          |           |
|------|-----------|----------|-----------|
| 28.H | -1.240795 | 1.794990 | 2.975131  |
| 29.H | -2.536516 | 1.941328 | 0.836211  |
| 30.H | 2.536516  | 1.941328 | 0.836211  |
| 31.H | 2.182639  | 2.203614 | -2.117454 |
| 32.H | 0.000000  | 2.357643 | -3.663295 |
| 33.H | -2.182639 | 2.203614 | -2.117454 |

**[Nb( $\eta^5$ -Ind)( $\eta^6$ -Ind)] ( $C_7$ ) S = 3/2,  $E_T$  (BP86) = -209.334,  $E_T$  (B3LYP/BP86) = -245.313**

| Atom | X         | Y         | Z         |
|------|-----------|-----------|-----------|
| 1.Nb | 0.067062  | -0.013032 | -0.083165 |
| 2.C  | 1.211279  | -0.079011 | 2.146737  |
| 3.C  | 0.217662  | -1.140308 | 2.153983  |
| 4.C  | -1.075929 | -0.524080 | 2.018280  |
| 5.C  | -0.883622 | 0.887318  | 1.987419  |
| 6.C  | 0.510982  | 1.172534  | 2.010107  |
| 7.C  | 0.635651  | -2.495705 | 2.273382  |
| 8.C  | 1.982195  | -2.775177 | 2.416015  |
| 9.C  | 2.956396  | -1.737227 | 2.404391  |
| 10.C | 2.591435  | -0.411518 | 2.252709  |
| 11.H | -2.033611 | -1.037363 | 2.034060  |
| 12.H | -1.674998 | 1.629450  | 1.924872  |
| 13.H | 0.958368  | 2.162064  | 2.004532  |
| 14.H | -0.105720 | -3.296314 | 2.285118  |
| 15.H | 2.308506  | -3.808830 | 2.537438  |
| 16.H | 4.009996  | -1.997279 | 2.512809  |
| 17.H | 3.344476  | 0.377876  | 2.248404  |
| 18.C | 1.367294  | 0.219882  | -2.231061 |
| 19.C | 0.529483  | 1.366656  | -2.191427 |
| 20.C | -0.942497 | 1.186522  | -2.086757 |
| 21.C | -1.479710 | -0.130941 | -2.035720 |
| 22.C | -0.619543 | -1.249773 | -2.096080 |
| 23.C | 0.798680  | -1.074135 | -2.179380 |
| 24.C | -1.522414 | 2.481423  | -2.073791 |
| 25.C | -0.472599 | 3.416875  | -2.184003 |
| 26.C | 0.773950  | 2.764907  | -2.239930 |
| 27.H | 2.450751  | 0.330013  | -2.293792 |
| 28.H | -2.557759 | -0.282302 | -1.959439 |
| 29.H | -1.034825 | -2.255801 | -2.064672 |
| 30.H | 1.444714  | -1.950121 | -2.205593 |
| 31.H | -2.584626 | 2.704370  | -2.015573 |
| 32.H | -0.608519 | 4.496992  | -2.218033 |
| 33.H | 1.748387  | 3.239177  | -2.321932 |

**[Nb( $\eta^6$ -Ind)<sub>2</sub>] ( $C_2$ ) S = 3/2,  $E_T$  (BP86) = -209.087,  $E_T$  (B3LYP/BP86) = -245.795**

| Atom | X        | Y         | Z         |
|------|----------|-----------|-----------|
| 1.V  | 0.000000 | 0.000000  | 0.130808  |
| 2.C  | 1.991366 | 0.062996  | -1.322304 |
| 3.C  | 1.942617 | -1.261605 | -0.649044 |
| 4.C  | 1.839610 | -1.314578 | 0.767034  |
| 5.C  | 1.809445 | -0.120192 | 1.522158  |
| 6.C  | 1.845159 | 1.155239  | 0.871160  |
| 7.C  | 1.919025 | 1.241556  | -0.537058 |
| 8.C  | 2.005403 | -2.246151 | -1.664663 |

|      |           |           |           |
|------|-----------|-----------|-----------|
| 9.C  | 2.106884  | -1.573731 | -2.901094 |
| 10.C | 2.084427  | -0.178910 | -2.714606 |
| 11.H | 1.782203  | -2.275988 | 1.279924  |
| 12.H | 1.733690  | -0.166860 | 2.607777  |
| 13.H | 1.790053  | 2.064630  | 1.468302  |
| 14.H | 1.905360  | 2.220692  | -1.018121 |
| 15.H | 2.001296  | -3.322831 | -1.513045 |
| 16.H | 2.185512  | -2.067165 | -3.868772 |
| 17.H | 2.126362  | 0.578785  | -3.492374 |
| 18.C | -1.991366 | -0.062996 | -1.322304 |
| 19.C | -1.942617 | 1.261605  | -0.649044 |
| 20.C | -1.839610 | 1.314578  | 0.767034  |
| 21.C | -1.809445 | 0.120192  | 1.522158  |
| 22.C | -1.845159 | -1.155239 | 0.871160  |
| 23.C | -1.919025 | -1.241556 | -0.537058 |
| 24.C | -2.005403 | 2.246151  | -1.664663 |
| 25.C | -2.106884 | 1.573731  | -2.901094 |
| 26.C | -2.084427 | 0.178910  | -2.714606 |
| 27.H | -1.782203 | 2.275988  | 1.279924  |
| 28.H | -1.733690 | 0.166860  | 2.607777  |
| 29.H | -1.790053 | -2.064630 | 1.468302  |
| 30.H | -1.905360 | -2.220692 | -1.018121 |
| 31.H | -2.001296 | 3.322831  | -1.513045 |
| 32.H | -2.185512 | 2.067165  | -3.868772 |
| 33.H | -2.126362 | -0.578785 | -3.492374 |

### Compounds for TNE = 24

$\text{Cr}(\eta^5\text{-Ind})_2 (C_{2v}) S = 1, E_T (\text{BP86}) = -210.142, E_T (\text{B3LYP/BP86}) = -248.077.$

| Atom | X         | Y         | Z         |
|------|-----------|-----------|-----------|
| 1.Cr | 0.000000  | 0.000000  | 0.868948  |
| 2.C  | -0.726078 | 2.055681  | 0.066605  |
| 3.C  | 0.726078  | 2.055681  | 0.066605  |
| 4.C  | 1.165666  | 1.761172  | 1.406699  |
| 5.C  | 0.000000  | 1.631574  | 2.242497  |
| 6.C  | -1.165666 | 1.761172  | 1.406699  |
| 7.C  | 1.427404  | 2.289560  | -1.147980 |
| 8.C  | 0.710950  | 2.543203  | -2.303373 |
| 9.C  | -0.710950 | 2.543203  | -2.303373 |
| 10.C | -1.427404 | 2.289560  | -1.147980 |
| 11.H | 2.198589  | 1.724232  | 1.742962  |
| 12.H | 0.000000  | 1.516359  | 3.322229  |
| 13.H | -2.198589 | 1.724232  | 1.742962  |
| 14.H | 2.519212  | 2.296368  | -1.155966 |
| 15.H | 1.241917  | 2.744072  | -3.235264 |
| 16.H | -1.241917 | 2.744072  | -3.235264 |
| 17.H | -2.519212 | 2.296368  | -1.155966 |
| 18.C | -0.726078 | -2.055681 | 0.066605  |
| 19.C | -1.165666 | -1.761172 | 1.406699  |
| 20.C | 0.000000  | -1.631574 | 2.242497  |

|      |           |           |           |
|------|-----------|-----------|-----------|
| 21.C | 1.165666  | -1.761172 | 1.406699  |
| 22.C | 0.726078  | -2.055681 | 0.066605  |
| 23.C | -1.427404 | -2.289560 | -1.147980 |
| 24.C | -0.710950 | -2.543203 | -2.303373 |
| 25.C | 0.710950  | -2.543203 | -2.303373 |
| 26.C | 1.427404  | -2.289560 | -1.147980 |
| 27.H | 0.000000  | -1.516359 | 3.322229  |
| 28.H | 2.198589  | -1.724232 | 1.742962  |
| 29.H | -2.198589 | -1.724232 | 1.742962  |
| 30.H | -2.519212 | -2.296368 | -1.155966 |
| 31.H | -1.241917 | -2.744072 | -3.235264 |
| 32.H | 1.241917  | -2.744072 | -3.235264 |
| 33.H | 2.519212  | -2.296368 | -1.155966 |

$\text{Cr}(\eta^5\text{-Ind})_2 (C_{2v}) S = 2, E_T (\text{BP86}) = -209.955, E_T (\text{B3LYP/BP86}) = -248.516.$

| Atom | X         | Y         | Z         |
|------|-----------|-----------|-----------|
| 1.Cr | 0.000000  | 0.000000  | 1.203111  |
| 2.C  | -0.723580 | 2.097540  | -0.011180 |
| 3.C  | 0.723580  | 2.097540  | -0.011180 |
| 4.C  | 1.157306  | 2.001272  | 1.369287  |
| 5.C  | 0.000000  | 2.053807  | 2.196382  |
| 6.C  | -1.157306 | 2.001272  | 1.369287  |
| 7.C  | 1.427136  | 2.178581  | -1.232742 |
| 8.C  | 0.706691  | 2.280007  | -2.418992 |
| 9.C  | -0.706691 | 2.280007  | -2.418992 |
| 10.C | -1.427136 | 2.178581  | -1.232742 |
| 11.H | 2.187524  | 2.037283  | 1.714734  |
| 12.H | 0.000000  | 2.073142  | 3.284041  |
| 13.H | -2.187524 | 2.037283  | 1.714734  |
| 14.H | 2.518559  | 2.179284  | -1.242804 |
| 15.H | 1.239996  | 2.362859  | -3.366935 |
| 16.H | -1.239996 | 2.362859  | -3.366935 |
| 17.H | -2.518559 | 2.179284  | -1.242804 |
| 18.C | -0.723580 | -2.097540 | -0.011180 |
| 19.C | -1.157306 | -2.001272 | 1.369287  |
| 20.C | 0.000000  | -2.053807 | 2.196382  |
| 21.C | 1.157306  | -2.001272 | 1.369287  |
| 22.C | 0.723580  | -2.097540 | -0.011180 |
| 23.C | -1.427136 | -2.178581 | -1.232742 |
| 24.C | -0.706691 | -2.280007 | -2.418992 |
| 25.C | 0.706691  | -2.280007 | -2.418992 |
| 26.C | 1.427136  | -2.178581 | -1.232742 |
| 27.H | 0.000000  | -2.073142 | 3.284041  |
| 28.H | 2.187524  | -2.037283 | 1.714734  |
| 29.H | -2.187524 | -2.037283 | 1.714734  |
| 30.H | -2.518559 | -2.179284 | -1.242804 |
| 31.H | -1.239996 | -2.362859 | -3.366935 |
| 32.H | 1.239996  | -2.362859 | -3.366935 |
| 33.H | 2.518559  | -2.179284 | -1.242804 |

**Cr( $\eta^5$ -Ind)( $\eta^6$ -Ind) ( $C_3$ ) S = 1,  $E_T$  (BP86) = -209.692,  $E_T$  (B3LYP/BP86) = -247.456**

| Atom | X         | Y         | Z         |
|------|-----------|-----------|-----------|
| 1.Cr | 0.229747  | 0.820486  | 0.000000  |
| 2.C  | -1.902468 | 0.238521  | 0.726018  |
| 3.C  | -1.902468 | 0.238521  | -0.726018 |
| 4.C  | -1.480829 | 1.545961  | -1.165801 |
| 5.C  | -1.281354 | 2.359195  | 0.000000  |
| 6.C  | -1.480829 | 1.545961  | 1.165801  |
| 7.C  | -2.252312 | -0.947756 | -1.429948 |
| 8.C  | -2.606590 | -2.072388 | -0.712343 |
| 9.C  | -2.606590 | -2.072388 | 0.712343  |
| 10.C | -2.252312 | -0.947756 | 1.429948  |
| 11.H | -1.406671 | 1.878313  | -2.197722 |
| 12.H | -1.022105 | 3.414252  | 0.000000  |
| 13.H | -1.406671 | 1.878313  | 2.197722  |
| 14.H | -2.257820 | -0.956130 | -2.521334 |
| 15.H | -2.889225 | -2.983362 | -1.241639 |
| 16.H | -2.889225 | -2.983362 | 1.241639  |
| 17.H | -2.257820 | -0.956130 | 2.521334  |
| 18.C | 1.852525  | -0.672829 | 0.738512  |
| 19.C | 1.887996  | 0.574371  | 1.441263  |
| 20.C | 2.069829  | 1.783244  | 0.713611  |
| 21.C | 2.069829  | 1.783244  | -0.713611 |
| 22.C | 1.887996  | 0.574371  | -1.441263 |
| 23.C | 1.852525  | -0.672829 | -0.738512 |
| 24.C | 1.745234  | -2.024125 | 1.157397  |
| 25.C | 1.708795  | -2.827325 | 0.000000  |
| 26.C | 1.745234  | -2.024125 | -1.157397 |
| 27.H | 1.819742  | 0.602921  | 2.528982  |
| 28.H | 2.106731  | 2.735071  | -1.243147 |
| 29.H | 1.819742  | 0.602921  | -2.528982 |
| 30.H | 2.106731  | 2.735071  | 1.243147  |
| 31.H | 1.714638  | -2.371042 | 2.187907  |
| 32.H | 1.645258  | -3.914501 | 0.000000  |
| 33.H | 1.714638  | -2.371042 | -2.187907 |

**Cr( $\eta^6$ -Ind)<sub>2</sub> ( $C_{2h}$ ) S = 1,  $E_T$  (BP86) = -209.450,  $E_T$  (B3LYP/BP86) = -247.718**

| Atom | X         | Y        | Z         |
|------|-----------|----------|-----------|
| 1.Cr | 0.000000  | 0.000000 | 0.000000  |
| 2.C  | 1.973561  | 0.998855 | -0.739488 |
| 3.C  | 1.973561  | 0.998855 | 0.739488  |
| 4.C  | 0.829800  | 1.493657 | 1.439526  |
| 5.C  | -0.237786 | 2.082642 | 0.713269  |
| 6.C  | -0.237786 | 2.082642 | -0.713269 |
| 7.C  | 0.829800  | 1.493657 | -1.439526 |
| 8.C  | 3.186602  | 0.394888 | 1.158814  |
| 9.C  | 3.915171  | 0.059316 | 0.000000  |
| 10.C | 3.186602  | 0.394888 | -1.158814 |
| 11.H | 0.779754  | 1.445054 | 2.527320  |
| 12.H | -1.121909 | 2.436819 | 1.241847  |
| 13.H | -1.121909 | 2.436819 | -1.241847 |
| 14.H | 0.779754  | 1.445054 | -2.527320 |



|      |           |           |           |
|------|-----------|-----------|-----------|
| 15.H | 3.498895  | 0.243027  | 2.189184  |
| 16.H | 4.899546  | -0.406023 | 0.000000  |
| 17.H | 3.498895  | 0.243027  | -2.189184 |
| 18.C | 0.237786  | -2.082642 | -0.713269 |
| 19.C | -0.829800 | -1.493657 | -1.439526 |
| 20.C | -1.973561 | -0.998855 | -0.739488 |
| 21.C | -1.973561 | -0.998855 | 0.739488  |
| 22.C | -0.829800 | -1.493657 | 1.439526  |
| 23.C | 0.237786  | -2.082642 | 0.713269  |
| 24.C | -3.186602 | -0.394888 | 1.158814  |
| 25.C | -3.915171 | -0.059316 | 0.000000  |
| 26.C | -3.186602 | -0.394888 | -1.158814 |
| 27.H | 1.121909  | -2.436819 | -1.241847 |
| 28.H | 1.121909  | -2.436819 | 1.241847  |
| 29.H | -0.779754 | -1.445054 | 2.527320  |
| 30.H | -0.779754 | -1.445054 | -2.527320 |
| 31.H | -3.498895 | -0.243027 | 2.189184  |
| 32.H | -4.899546 | 0.406023  | 0.000000  |
| 33.H | -3.498895 | -0.243027 | -2.189184 |

**Mo( $\eta^5$ -Ind)<sub>2</sub> (C<sub>2v</sub>) S = 1, E<sub>T</sub> (BP86) = -209.917, E<sub>T</sub> (B3LYP/BP86) = -246.331.**

|      |           |           |           |
|------|-----------|-----------|-----------|
| 1.Mo | 0.000000  | 0.000000  | 0.858892  |
| 2.C  | -0.726425 | 2.228290  | 0.069088  |
| 3.C  | 0.726425  | 2.228290  | 0.069088  |
| 4.C  | 1.166511  | 1.932818  | 1.410648  |
| 5.C  | 0.000000  | 1.811056  | 2.246792  |
| 6.C  | -1.166511 | 1.932818  | 1.410648  |
| 7.C  | 1.427937  | 2.471654  | -1.144259 |
| 8.C  | 0.711106  | 2.738500  | -2.297099 |
| 9.C  | -0.711106 | 2.738500  | -2.297099 |
| 10.C | -1.427937 | 2.471654  | -1.144259 |
| 11.H | 2.198040  | 1.918627  | 1.751533  |
| 12.H | 0.000000  | 1.712453  | 3.328244  |
| 13.H | -2.198040 | 1.918627  | 1.751533  |
| 14.H | 2.519229  | 2.475852  | -1.153543 |
| 15.H | 1.242617  | 2.947566  | -3.226210 |
| 16.H | -1.242617 | 2.947566  | -3.226210 |
| 17.H | -2.519229 | 2.475852  | -1.153543 |
| 18.C | -0.726425 | -2.228290 | 0.069088  |
| 19.C | -1.166511 | -1.932818 | 1.410648  |
| 20.C | 0.000000  | -1.811056 | 2.246792  |
| 21.C | 1.166511  | -1.932818 | 1.410648  |
| 22.C | 0.726425  | -2.228290 | 0.069088  |
| 23.C | -1.427937 | -2.471654 | -1.144259 |
| 24.C | -0.711106 | -2.738500 | -2.297099 |
| 25.C | 0.711106  | -2.738500 | -2.297099 |
| 26.C | 1.427937  | -2.471654 | -1.144259 |
| 27.H | 0.000000  | -1.712453 | 3.328244  |
| 28.H | 2.198040  | -1.918627 | 1.751533  |
| 29.H | -2.198040 | -1.918627 | 1.751533  |
| 30.H | -2.519229 | -2.475852 | -1.153543 |
| 31.H | -1.242617 | -2.947566 | -3.226210 |
| 32.H | 1.242617  | -2.947566 | -3.226210 |
| 33.H | 2.519229  | -2.475852 | -1.153543 |

**Mo( $\eta^5$ -Ind)<sub>2</sub> (C<sub>2v</sub>) S = 1, E<sub>T</sub> (BP86) = -209.695, E<sub>T</sub> (B3LYP/BP86) = -246.131.**

| Atom | X         | Y         | Z         |
|------|-----------|-----------|-----------|
| 1.Mo | 0.000000  | 0.000000  | 0.757947  |
| 2.C  | -0.723314 | 2.212296  | 0.152135  |
| 3.C  | 0.723314  | 2.212296  | 0.152135  |
| 4.C  | 1.168775  | 1.845627  | 1.482119  |
| 5.C  | 0.000000  | 1.695117  | 2.298448  |
| 6.C  | -1.168775 | 1.845627  | 1.482119  |
| 7.C  | 1.422239  | 2.310129  | -1.070480 |
| 8.C  | 0.700018  | 2.529549  | -2.255400 |
| 9.C  | -0.700018 | 2.529549  | -2.255400 |
| 10.C | -1.422239 | 2.310129  | -1.070480 |
| 11.H | 2.198312  | 1.837400  | 1.827885  |
| 12.H | 0.000000  | 1.509647  | 3.369082  |
| 13.H | -2.198312 | 1.837400  | 1.827885  |
| 14.H | 2.511875  | 2.256766  | -1.085177 |
| 15.H | 1.238020  | 2.655155  | -3.195693 |
| 16.H | -1.238020 | 2.655155  | -3.195693 |
| 17.H | -2.511875 | 2.256766  | -1.085177 |
| 18.C | -0.723314 | -2.212296 | 0.152135  |
| 19.C | -1.168775 | -1.845627 | 1.482119  |
| 20.C | 0.000000  | -1.695117 | 2.298448  |
| 21.C | 1.168775  | -1.845627 | 1.482119  |
| 22.C | 0.723314  | -2.212296 | 0.152135  |
| 23.C | -1.422239 | -2.310129 | -1.070480 |
| 24.C | -0.700018 | -2.529549 | -2.255400 |
| 25.C | 0.700018  | -2.529549 | -2.255400 |
| 26.C | 1.422239  | -2.310129 | -1.070480 |
| 27.H | 0.000000  | -1.509647 | 3.369082  |
| 28.H | 2.198312  | -1.837400 | 1.827885  |
| 29.H | -2.198312 | -1.837400 | 1.827885  |
| 30.H | -2.511875 | -2.256766 | -1.085177 |
| 31.H | -1.238020 | -2.655155 | -3.195693 |
| 32.H | 1.238020  | -2.655155 | -3.195693 |
| 33.H | 2.511875  | -2.256766 | -1.085177 |

**Mo( $\eta^5$ -Ind)( $\eta^6$ -Ind) (C<sub>s</sub>) S = 0, E<sub>T</sub> (BP86) = -209.309, E<sub>T</sub> (B3LYP/BP86) = -245.755.**

| Atom | X         | Y         | Z         |
|------|-----------|-----------|-----------|
| 1.Mo | 0.221487  | 0.760042  | 0.000000  |
| 2.C  | -2.076537 | 0.325430  | 0.722751  |
| 3.C  | -2.076537 | 0.325430  | -0.722751 |
| 4.C  | -1.611496 | 1.622194  | -1.161564 |
| 5.C  | -1.404481 | 2.427450  | 0.000000  |
| 6.C  | -1.611496 | 1.622194  | 1.161564  |
| 7.C  | -2.416930 | -0.853835 | -1.424488 |
| 8.C  | -2.820589 | -1.978155 | -0.703736 |
| 9.C  | -2.820589 | -1.978155 | 0.703736  |
| 10.C | -2.416930 | -0.853835 | 1.424488  |
| 11.H | -1.570216 | 1.966765  | -2.190796 |
| 12.H | -1.149189 | 3.483416  | 0.000000  |
| 13.H | -1.570216 | 1.966765  | 2.190796  |
| 14.H | -2.396069 | -0.870801 | -2.514483 |

|      |           |           |           |
|------|-----------|-----------|-----------|
| 15.H | -3.115895 | -2.880599 | -1.239296 |
| 16.H | -3.115895 | -2.880599 | 1.239296  |
| 17.H | -2.396069 | -0.870801 | 2.514483  |
| 18.C | 2.038661  | -0.580811 | 0.729234  |
| 19.C | 2.041232  | 0.662467  | 1.449771  |
| 20.C | 2.180808  | 1.865660  | 0.711004  |
| 21.C | 2.180808  | 1.865660  | -0.711004 |
| 22.C | 2.041232  | 0.662467  | -1.449771 |
| 23.C | 2.038661  | -0.580811 | -0.729234 |
| 24.C | 1.939529  | -1.941080 | 1.146408  |
| 25.C | 1.914404  | -2.755936 | 0.000000  |
| 26.C | 1.939529  | -1.941080 | -1.146408 |
| 27.H | 2.034647  | 0.683551  | 2.538884  |
| 28.H | 2.213318  | 2.820370  | -1.237352 |
| 29.H | 2.034647  | 0.683551  | -2.538884 |
| 30.H | 2.213318  | 2.820370  | 1.237352  |
| 31.H | 1.881289  | -2.281297 | 2.177398  |
| 32.H | 1.822032  | -3.839043 | 0.000000  |
| 33.H | 1.881289  | -2.281297 | -2.177398 |

**Mo( $\eta^5$ -Ind)( $\eta^6$ -Ind) ( $C_S$ ) S = 1,  $E_T$  (BP86) = -209.397,  $E_T$  (B3LYP/BP86) = -245.906.**

| Atom | X         | Y         | Z         |
|------|-----------|-----------|-----------|
| 1.Mo | 0.221650  | 0.805881  | 0.000000  |
| 2.C  | -2.090175 | 0.316950  | 0.725735  |
| 3.C  | -2.090175 | 0.316950  | -0.725735 |
| 4.C  | -1.641402 | 1.614986  | -1.166243 |
| 5.C  | -1.430709 | 2.422194  | 0.000000  |
| 6.C  | -1.641402 | 1.614986  | 1.166243  |
| 7.C  | -2.477577 | -0.857015 | -1.428455 |
| 8.C  | -2.877915 | -1.967209 | -0.711771 |
| 9.C  | -2.877915 | -1.967209 | 0.711771  |
| 10.C | -2.477577 | -0.857015 | 1.428455  |
| 11.H | -1.588166 | 1.954022  | -2.196304 |
| 12.H | -1.174094 | 3.477476  | 0.000000  |
| 13.H | -1.588166 | 1.954022  | 2.196304  |
| 14.H | -2.482850 | -0.867238 | -2.518577 |
| 15.H | -3.197380 | -2.863242 | -1.244185 |
| 16.H | -3.197380 | -2.863242 | 1.244185  |
| 17.H | -2.482850 | -0.867238 | 2.518577  |
| 18.C | 2.068851  | -0.620348 | 0.736401  |
| 19.C | 2.065911  | 0.620119  | 1.447285  |
| 20.C | 2.160981  | 1.838501  | 0.717058  |
| 21.C | 2.160981  | 1.838501  | -0.717058 |
| 22.C | 2.065911  | 0.620119  | -1.447285 |
| 23.C | 2.068851  | -0.620348 | -0.736401 |
| 24.C | 2.025611  | -1.981864 | 1.155466  |
| 25.C | 2.022423  | -2.786525 | 0.000000  |
| 26.C | 2.025611  | -1.981864 | -1.155466 |
| 27.H | 2.037451  | 0.639295  | 2.535902  |
| 28.H | 2.181002  | 2.788956  | -1.248839 |
| 29.H | 2.037451  | 0.639295  | -2.535902 |
| 30.H | 2.181002  | 2.788956  | 1.248839  |
| 31.H | 2.006334  | -2.327933 | 2.185067  |
| 32.H | 2.000482  | -3.874406 | 0.000000  |

33.H 2.006334 -2.327933 -2.185067

**Mo( $\eta^6$ -Ind)<sub>2</sub> (C<sub>2</sub>) S = 0, E<sub>T</sub> (BP86) = -209.236, E<sub>T</sub> (B3LYP/BP86) = -245.236.**

| Atom | X         | Y         | Z         |
|------|-----------|-----------|-----------|
| 1.Mo | 0.000000  | 0.000000  | -0.080495 |
| 2.C  | 2.005437  | -0.262343 | -1.403087 |
| 3.C  | 2.013567  | -1.258274 | -0.330490 |
| 4.C  | 1.876308  | -0.838934 | 1.030160  |
| 5.C  | 1.821880  | 0.548022  | 1.315975  |
| 6.C  | 1.819633  | 1.516357  | 0.270207  |
| 7.C  | 1.856970  | 1.125875  | -1.084139 |
| 8.C  | 2.157119  | -2.540601 | -0.949979 |
| 9.C  | 2.251467  | -2.343218 | -2.335971 |
| 10.C | 2.126723  | -0.968858 | -2.632373 |
| 11.H | 1.881099  | -1.566305 | 1.842924  |
| 12.H | 1.743643  | 0.883824  | 2.350903  |
| 13.H | 1.727160  | 2.573026  | 0.524204  |
| 14.H | 1.827530  | 1.878646  | -1.872422 |
| 15.H | 2.196056  | -3.495119 | -0.430181 |
| 16.H | 2.361543  | -3.134131 | -3.075511 |
| 17.H | 2.118473  | -0.522493 | -3.623860 |
| 18.C | -2.005437 | 0.262343  | -1.403087 |
| 19.C | -2.013567 | 1.258274  | -0.330490 |
| 20.C | -1.876308 | 0.838934  | 1.030160  |
| 21.C | -1.821880 | -0.548022 | 1.315975  |
| 22.C | -1.819633 | -1.516357 | 0.270207  |
| 23.C | -1.856970 | -1.125875 | -1.084139 |
| 24.C | -2.157119 | 2.540601  | -0.949979 |
| 25.C | -2.251467 | 2.343218  | -2.335971 |
| 26.C | -2.126723 | 0.968858  | -2.632373 |
| 27.H | -1.881099 | 1.566305  | 1.842924  |
| 28.H | -1.743643 | -0.883824 | 2.350903  |
| 29.H | -1.727160 | -2.573026 | 0.524204  |
| 30.H | -1.827530 | -1.878646 | -1.872422 |
| 31.H | -2.196056 | 3.495119  | -0.430181 |
| 32.H | -2.361543 | 3.134131  | -3.075511 |
| 33.H | -2.118473 | 0.522493  | -3.623860 |

### Compounds for TNE = 25

**Mn( $\eta^5$ -Ind)<sub>2</sub> (C<sub>2</sub>) S = 5/2, E<sub>T</sub> (BP86) = -209.635, E<sub>T</sub> (B3LYP/BP86) = -248.832.**

| Atom | X        | Y         | Z         |
|------|----------|-----------|-----------|
| 1.Mn | 0.000000 | 0.000000  | -0.037947 |
| 2.C  | 2.296003 | -0.269925 | -1.144610 |
| 3.C  | 2.389243 | -1.308083 | -0.130439 |
| 4.C  | 2.163162 | -0.692065 | 1.147685  |
| 5.C  | 1.968245 | 0.697235  | 0.936293  |
| 6.C  | 1.992974 | 0.974947  | -0.473382 |
| 7.C  | 2.654288 | -2.644282 | -0.519513 |
| 8.C  | 2.848559 | -2.933244 | -1.862317 |
| 9.C  | 2.771306 | -1.916644 | -2.850093 |
| 10.C | 2.490008 | -0.601298 | -2.507895 |
| 11.H | 2.175542 | -1.192408 | 2.112922  |

|      |           |           |           |
|------|-----------|-----------|-----------|
| 12.H | 1.846039  | 1.444133  | 1.718444  |
| 13.H | 1.985669  | 1.962828  | -0.927756 |
| 14.H | 2.723765  | -3.433659 | 0.232015  |
| 15.H | 3.070262  | -3.957176 | -2.168457 |
| 16.H | 2.939997  | -2.176701 | -3.896202 |
| 17.H | 2.434054  | 0.172285  | -3.276844 |
| 18.C | -2.296003 | 0.269925  | -1.144610 |
| 19.C | -2.389243 | 1.308083  | -0.130439 |
| 20.C | -2.163162 | 0.692065  | 1.147685  |
| 21.C | -1.968245 | -0.697235 | 0.936293  |
| 22.C | -1.992974 | -0.974947 | -0.473382 |
| 23.C | -2.654288 | 2.644282  | -0.519513 |
| 24.C | -2.848559 | 2.933244  | -1.862317 |
| 25.C | -2.771306 | 1.916644  | -2.850093 |
| 26.C | -2.490008 | 0.601298  | -2.507895 |
| 27.H | -2.175542 | 1.192408  | 2.112922  |
| 28.H | -1.846039 | -1.444133 | 1.718444  |
| 29.H | -1.985669 | -1.962828 | -0.927756 |
| 30.H | -2.723765 | 3.433659  | 0.232015  |
| 31.H | -3.070262 | 3.957176  | -2.168457 |
| 32.H | -2.939997 | 2.176701  | -3.896202 |
| 33.H | -2.434054 | -0.172285 | -3.276844 |

**Mn( $\eta^5$ -Ind)<sub>2</sub> (C<sub>2h</sub>) S = 3/2, E<sub>T</sub> (BP86) = -209.913, E<sub>T</sub> (B3LYP/BP86) = -248.496.**

| Atom | X         | Y         | Z         |
|------|-----------|-----------|-----------|
| 1.Mn | 0.000000  | 0.000000  | 0.000000  |
| 2.C  | 0.997442  | -1.861645 | 0.000000  |
| 3.C  | 0.154420  | -1.851359 | -1.162279 |
| 4.C  | -1.216311 | -2.081898 | -0.721397 |
| 5.C  | -1.216311 | -2.081898 | 0.721397  |
| 6.C  | 0.154420  | -1.851359 | 1.162279  |
| 7.C  | -3.605649 | -2.432540 | -0.705035 |
| 8.C  | -2.424548 | -2.248021 | -1.424086 |
| 9.C  | -3.605649 | -2.432540 | 0.705035  |
| 10.C | -2.424548 | -2.248021 | 1.424086  |
| 11.H | 2.084648  | -1.849323 | 0.000000  |
| 12.H | 0.497119  | -1.884330 | -2.193296 |
| 13.H | 0.497119  | -1.884330 | 2.193296  |
| 14.H | -4.544079 | -2.584348 | -1.240360 |
| 15.H | -2.434464 | -2.246284 | -2.515703 |
| 16.H | -4.544079 | -2.584348 | 1.240360  |
| 17.H | -2.434464 | -2.246284 | 2.515703  |
| 18.C | 1.216311  | 2.081898  | 0.721397  |
| 19.C | -0.154420 | 1.851359  | 1.162279  |
| 20.C | -0.997442 | 1.861645  | 0.000000  |
| 21.C | -0.154420 | 1.851359  | -1.162279 |
| 22.C | 1.216311  | 2.081898  | -0.721397 |
| 23.C | 3.605649  | 2.432540  | -0.705035 |
| 24.C | 2.424548  | 2.248021  | -1.424086 |
| 25.C | 3.605649  | 2.432540  | 0.705035  |
| 26.C | 2.424548  | 2.248021  | 1.424086  |
| 27.H | -2.084648 | 1.849323  | 0.000000  |
| 28.H | -0.497119 | 1.884330  | 2.193296  |
| 29.H | -0.497119 | 1.884330  | -2.193296 |

|      |          |          |           |
|------|----------|----------|-----------|
| 30.H | 4.544079 | 2.584348 | -1.240360 |
| 31.H | 2.434464 | 2.246284 | -2.515703 |
| 32.H | 4.544079 | 2.584348 | 1.240360  |
| 33.H | 2.434464 | 2.246284 | 2.515703  |

**Mn( $\eta^5$ -Ind)<sub>2</sub> (C<sub>2v</sub>) S = 1/2, E<sub>T</sub> (BP86) = -209.973, E<sub>T</sub> (B3LYP/BP86) = -248.234.**

| Atom | X         | Y         | Z         |
|------|-----------|-----------|-----------|
| 1.Mn | 0.000000  | 0.000000  | 0.900353  |
| 2.C  | -0.725478 | 1.972728  | 0.064079  |
| 3.C  | 0.725478  | 1.972728  | 0.064079  |
| 4.C  | 1.167508  | 1.705208  | 1.408828  |
| 5.C  | 0.000000  | 1.602532  | 2.239481  |
| 6.C  | -1.167508 | 1.705208  | 1.408828  |
| 7.C  | 1.429110  | 2.150389  | -1.159729 |
| 8.C  | 0.711453  | 2.362458  | -2.322767 |
| 9.C  | -0.711453 | 2.362458  | -2.322767 |
| 10.C | -1.429110 | 2.150389  | -1.159729 |
| 11.H | 2.199550  | 1.681058  | 1.748818  |
| 12.H | 0.000000  | 1.476422  | 3.319150  |
| 13.H | -2.199550 | 1.681058  | 1.748818  |
| 14.H | 2.520499  | 2.144260  | -1.169272 |
| 15.H | 1.241579  | 2.521273  | -3.262977 |
| 16.H | -1.241579 | 2.521273  | -3.262977 |
| 17.H | -2.520499 | 2.144260  | -1.169272 |
| 18.C | -0.725478 | -1.972728 | 0.064079  |
| 19.C | -1.167508 | -1.705208 | 1.408828  |
| 20.C | 0.000000  | -1.602532 | 2.239481  |
| 21.C | 1.167508  | -1.705208 | 1.408828  |
| 22.C | 0.725478  | -1.972728 | 0.064079  |
| 23.C | -1.429110 | -2.150389 | -1.159729 |
| 24.C | -0.711453 | -2.362458 | -2.322767 |
| 25.C | 0.711453  | -2.362458 | -2.322767 |
| 26.C | 1.429110  | -2.150389 | -1.159729 |
| 27.H | 0.000000  | -1.476422 | 3.319150  |
| 28.H | 2.199550  | -1.681058 | 1.748818  |
| 29.H | -2.199550 | -1.681058 | 1.748818  |
| 30.H | -2.520499 | -2.144260 | -1.169272 |
| 31.H | -1.241579 | -2.521273 | -3.262977 |
| 32.H | 1.241579  | -2.521273 | -3.262977 |
| 33.H | 2.520499  | -2.144260 | -1.169272 |

**Re( $\eta^5$ -Ind)<sub>2</sub> (C<sub>2v</sub>) S = 1/2, E<sub>T</sub> (BP86) = -212.019, E<sub>T</sub> (B3LYP/BP86) = -247.871.**

| Atom | X         | Y        | Z         |
|------|-----------|----------|-----------|
| 1.Re | 0.000000  | 0.000000 | 0.949639  |
| 2.C  | -0.726161 | 2.008275 | 0.045142  |
| 3.C  | 0.726161  | 2.008275 | 0.045142  |
| 4.C  | 1.169332  | 1.863390 | 1.413213  |
| 5.C  | 0.000000  | 1.839141 | 2.244755  |
| 6.C  | -1.169332 | 1.863390 | 1.413213  |
| 7.C  | 1.428598  | 2.012598 | -1.188292 |
| 8.C  | 0.709494  | 2.064135 | -2.371210 |
| 9.C  | -0.709494 | 2.064135 | -2.371210 |
| 10.C | -1.428598 | 2.012598 | -1.188292 |

|      |           |           |           |
|------|-----------|-----------|-----------|
| 11.H | 2.191842  | 1.926453  | 1.762827  |
| 12.H | 0.000000  | 1.840658  | 3.328666  |
| 13.H | -2.191842 | 1.926453  | 1.762827  |
| 14.H | 2.517485  | 1.977981  | -1.198760 |
| 15.H | 1.240979  | 2.082722  | -3.323420 |
| 16.H | -1.240979 | 2.082722  | -3.323420 |
| 17.H | -2.517485 | 1.977981  | -1.198760 |
| 18.C | -0.726161 | -2.008275 | 0.045142  |
| 19.C | -1.169332 | -1.863390 | 1.413213  |
| 20.C | 0.000000  | -1.839141 | 2.244755  |
| 21.C | 1.169332  | -1.863390 | 1.413213  |
| 22.C | 0.726161  | -2.008275 | 0.045142  |
| 23.C | -1.428598 | -2.012598 | -1.188292 |
| 24.C | -0.709494 | -2.064135 | -2.371210 |
| 25.C | 0.709494  | -2.064135 | -2.371210 |
| 26.C | 1.428598  | -2.012598 | -1.188292 |
| 27.H | 0.000000  | -1.840658 | 3.328666  |
| 28.H | 2.191842  | -1.926453 | 1.762827  |
| 29.H | -2.191842 | -1.926453 | 1.762827  |
| 30.H | -2.517485 | -1.977981 | -1.198760 |
| 31.H | -1.240979 | -2.082722 | -3.323420 |
| 32.H | 1.240979  | -2.082722 | -3.323420 |
| 33.H | 2.517485  | -1.977981 | -1.198760 |

**Re( $\eta^5$ -Ind)( $\eta^6$ -Ind) (C<sub>5</sub>) S = 1/2, E<sub>T</sub> (BP86) = -211.858, E<sub>T</sub> (B3LYP/BP86) = -247.625.**

| Atom | X         | Y         | Z         |
|------|-----------|-----------|-----------|
| 1.Re | 0.241567  | 0.861689  | 0.000000  |
| 2.C  | -1.879854 | 0.208535  | 0.727371  |
| 3.C  | -1.879854 | 0.208535  | -0.727371 |
| 4.C  | -1.569422 | 1.551761  | -1.165261 |
| 5.C  | -1.449343 | 2.377398  | 0.000000  |
| 6.C  | -1.569422 | 1.551761  | 1.165261  |
| 7.C  | -2.147094 | -0.998591 | -1.432290 |
| 8.C  | -2.407830 | -2.144817 | -0.712880 |
| 9.C  | -2.407830 | -2.144817 | 0.712880  |
| 10.C | -2.147094 | -0.998591 | 1.432290  |
| 11.H | -1.580604 | 1.903445  | -2.189654 |
| 12.H | -1.321343 | 3.453681  | 0.000000  |
| 13.H | -1.580604 | 1.903445  | 2.189654  |
| 14.H | -2.143061 | -1.010749 | -2.521685 |
| 15.H | -2.620285 | -3.076109 | -1.240218 |
| 16.H | -2.620285 | -3.076109 | 1.240218  |
| 17.H | -2.143061 | -1.010749 | 2.521685  |
| 18.C | 1.800116  | -0.686062 | 0.729317  |
| 19.C | 1.987973  | 0.527656  | 1.442733  |
| 20.C | 2.206550  | 1.727466  | 0.713045  |
| 21.C | 2.206550  | 1.727466  | -0.713045 |
| 22.C | 1.987973  | 0.527656  | -1.442733 |
| 23.C | 1.800116  | -0.686062 | -0.729317 |
| 24.C | 1.566802  | -2.042261 | 1.150339  |
| 25.C | 1.445607  | -2.836866 | 0.000000  |
| 26.C | 1.566802  | -2.042261 | -1.150339 |
| 27.H | 2.002598  | 0.541998  | 2.530182  |
| 28.H | 2.370123  | 2.661482  | -1.245587 |

|      |          |           |           |
|------|----------|-----------|-----------|
| 29.H | 2.002598 | 0.541998  | -2.530182 |
| 30.H | 2.370123 | 2.661482  | 1.245587  |
| 31.H | 1.467772 | -2.377198 | 2.179136  |
| 32.H | 1.255516 | -3.908796 | 0.000000  |
| 33.H | 1.467772 | -2.377198 | -2.179136 |

**Re( $\eta^6$ -Ind) ( $C_{2h}$ ) S = 1/2, E<sub>T</sub> (BP86) = -211.499, E<sub>T</sub> (B3LYP/BP86) = -247.062.**

| Atom | X         | Y         | Z         |
|------|-----------|-----------|-----------|
| 1.Re | 0.000000  | 0.000000  | 0.000000  |
| 2.C  | 2.006135  | 0.973522  | -0.735500 |
| 3.C  | 2.006135  | 0.973522  | 0.735500  |
| 4.C  | 0.909616  | 1.550632  | 1.438680  |
| 5.C  | -0.141832 | 2.165737  | 0.714634  |
| 6.C  | -0.141832 | 2.165737  | -0.714634 |
| 7.C  | 0.909616  | 1.550632  | -1.438680 |
| 8.C  | 3.223040  | 0.360977  | 1.154983  |
| 9.C  | 3.945298  | 0.018674  | 0.000000  |
| 10.C | 3.223040  | 0.360977  | -1.154983 |
| 11.H | 0.892428  | 1.556655  | 2.526795  |
| 12.H | -0.981075 | 2.607463  | 1.247165  |
| 13.H | -0.981075 | 2.607463  | -1.247165 |
| 14.H | 0.892428  | 1.556655  | -2.526795 |
| 15.H | 3.526642  | 0.187496  | 2.183156  |
| 16.H | 4.924390  | -0.457961 | 0.000000  |
| 17.H | 3.526642  | 0.187496  | -2.183156 |
| 18.C | 0.141832  | -2.165737 | -0.714634 |
| 19.C | -0.909616 | -1.550632 | -1.438680 |
| 20.C | -2.006135 | -0.973522 | -0.735500 |
| 21.C | -2.006135 | -0.973522 | 0.735500  |
| 22.C | -0.909616 | -1.550632 | 1.438680  |
| 23.C | 0.141832  | -2.165737 | 0.714634  |
| 24.C | -3.223040 | -0.360977 | 1.154983  |
| 25.C | -3.945298 | -0.018674 | 0.000000  |
| 26.C | -3.223040 | -0.360977 | -1.154983 |
| 27.H | 0.981075  | -2.607463 | -1.247165 |
| 28.H | 0.981075  | -2.607463 | 1.247165  |
| 29.H | -0.892428 | -1.556655 | 2.526795  |
| 30.H | -0.892428 | -1.556655 | -2.526795 |
| 31.H | -3.526642 | -0.187496 | 2.183156  |
| 32.H | -4.924390 | 0.457961  | 0.000000  |
| 33.H | -3.526642 | -0.187496 | -2.183156 |

### Compounds for TNE = 26

**Fe( $\eta^5$ -Ind)<sub>2</sub> ( $C_{2v}$ ) S = 0, E<sub>T</sub> (BP86) = -209.776, E<sub>T</sub> (B3LYP/BP86) = -247.836.**

| Atom | X         | Y        | Z         |
|------|-----------|----------|-----------|
| 1.Fe | 0.000000  | 0.000000 | 0.997801  |
| 2.C  | -0.730645 | 1.785963 | 0.040862  |
| 3.C  | 0.730645  | 1.785963 | 0.040862  |
| 4.C  | 1.167719  | 1.670395 | 1.408502  |
| 5.C  | 0.000000  | 1.643862 | 2.243907  |
| 6.C  | -1.167719 | 1.670395 | 1.408502  |
| 7.C  | 1.433515  | 1.877478 | -1.199175 |



|      |           |           |           |
|------|-----------|-----------|-----------|
| 8.C  | 0.716291  | 1.983930  | -2.369003 |
| 9.C  | -0.716291 | 1.983930  | -2.369003 |
| 10.C | -1.433515 | 1.877478  | -1.199175 |
| 11.H | 2.198544  | 1.652459  | 1.752751  |
| 12.H | 0.000000  | 1.592920  | 3.329627  |
| 13.H | -2.198544 | 1.652459  | 1.752751  |
| 14.H | 2.524925  | 1.895937  | -1.208308 |
| 15.H | 1.243402  | 2.079587  | -3.319529 |
| 16.H | -1.243402 | 2.079587  | -3.319529 |
| 17.H | -2.524925 | 1.895937  | -1.208308 |
| 18.C | -0.730645 | -1.785963 | 0.040862  |
| 19.C | -1.167719 | -1.670395 | 1.408502  |
| 20.C | 0.000000  | -1.643862 | 2.243907  |
| 21.C | 1.167719  | -1.670395 | 1.408502  |
| 22.C | 0.730645  | -1.785963 | 0.040862  |
| 23.C | -1.433515 | -1.877478 | -1.199175 |
| 24.C | -0.716291 | -1.983930 | -2.369003 |
| 25.C | 0.716291  | -1.983930 | -2.369003 |
| 26.C | 1.433515  | -1.877478 | -1.199175 |
| 27.H | 0.000000  | -1.592920 | 3.329627  |
| 28.H | 2.198544  | -1.652459 | 1.752751  |
| 29.H | -2.198544 | -1.652459 | 1.752751  |
| 30.H | -2.524925 | -1.895937 | -1.208308 |
| 31.H | -1.243402 | -2.079587 | -3.319529 |
| 32.H | 1.243402  | -2.079587 | -3.319529 |
| 33.H | 2.524925  | -1.895937 | -1.208308 |

**Fe( $\eta^5$ -Ind)( $\eta^6$ -Ind) ( $C_5$ ) S = 0,  $E_T$  (BP86) = -209.260,  $E_T$  (B3LYP/BP86) = -247.100**

| Atom | X         | Y         | Z         |
|------|-----------|-----------|-----------|
| 1.Fe | 0.617969  | 0.930405  | 0.000000  |
| 2.C  | -1.426511 | 1.046387  | 0.729198  |
| 3.C  | -1.426511 | 1.046387  | -0.729198 |
| 4.C  | -0.610807 | 2.151073  | -1.164859 |
| 5.C  | -0.150792 | 2.849972  | 0.000000  |
| 6.C  | -0.610807 | 2.151073  | 1.164859  |
| 7.C  | -2.145357 | 0.037244  | -1.434324 |
| 8.C  | -2.830016 | -0.916352 | -0.715184 |
| 9.C  | -2.830016 | -0.916352 | 0.715184  |
| 10.C | -2.145357 | 0.037244  | 1.434324  |
| 11.H | -0.411497 | 2.431055  | -2.196308 |
| 12.H | 0.455432  | 3.752672  | 0.000000  |
| 13.H | -0.411497 | 2.431055  | 2.196308  |
| 14.H | -2.159671 | 0.034424  | -2.525550 |
| 15.H | -3.388169 | -1.691503 | -1.241985 |
| 16.H | -3.388169 | -1.691503 | 1.241985  |
| 17.H | -2.159671 | 0.034424  | 2.525550  |
| 18.C | 1.441733  | -1.160359 | 0.744792  |
| 19.C | 1.926717  | -0.018334 | 1.432525  |
| 20.C | 2.551383  | 1.043232  | 0.716456  |
| 21.C | 2.551383  | 1.043232  | -0.716456 |
| 22.C | 1.926717  | -0.018334 | -1.432525 |
| 23.C | 1.441733  | -1.160359 | -0.744792 |

|      |          |           |           |
|------|----------|-----------|-----------|
| 24.C | 0.834561 | -2.364483 | 1.163844  |
| 25.C | 0.493338 | -3.085781 | 0.000000  |
| 26.C | 0.834561 | -2.364483 | -1.163844 |
| 27.H | 1.856778 | 0.042690  | 2.519899  |
| 28.H | 2.958033 | 1.899807  | -1.255184 |
| 29.H | 1.856778 | 0.042690  | -2.519899 |
| 30.H | 2.958033 | 1.899807  | 1.255184  |
| 31.H | 0.681122 | -2.682360 | 2.192081  |
| 32.H | 0.037350 | -4.075646 | 0.000000  |
| 33.H | 0.681122 | -2.682360 | -2.192081 |

**Fe( $\eta^5$ -Ind)<sub>2</sub> (C<sub>2v</sub>) S = 1, E<sub>T</sub> (BP86) = -209.396, E<sub>T</sub> (B3LYP/BP86) = -248.022.**

| Atom | X         | Y         | Z         |
|------|-----------|-----------|-----------|
| 1.Fe | 0.000000  | 0.000000  | 1.047153  |
| 2.C  | -0.721975 | 2.000582  | 0.017458  |
| 3.C  | 0.721975  | 2.000582  | 0.017458  |
| 4.C  | 1.157567  | 1.776609  | 1.386882  |
| 5.C  | 0.000000  | 1.768325  | 2.225179  |
| 6.C  | -1.157567 | 1.776609  | 1.386882  |
| 7.C  | 1.426175  | 2.144484  | -1.196511 |
| 8.C  | 0.705827  | 2.319155  | -2.376067 |
| 9.C  | -0.705827 | 2.319155  | -2.376067 |
| 10.C | -1.426175 | 2.144484  | -1.196511 |
| 11.H | 2.190124  | 1.779090  | 1.726579  |
| 12.H | 0.000000  | 1.728114  | 3.311169  |
| 13.H | -2.190124 | 1.779090  | 1.726579  |
| 14.H | 2.517602  | 2.134753  | -1.207521 |
| 15.H | 1.239533  | 2.453447  | -3.318153 |
| 16.H | -1.239533 | 2.453447  | -3.318153 |
| 17.H | -2.517602 | 2.134753  | -1.207521 |
| 18.C | -0.721975 | -2.000582 | 0.017458  |
| 19.C | -1.157567 | -1.776609 | 1.386882  |
| 20.C | 0.000000  | -1.768325 | 2.225179  |
| 21.C | 1.157567  | -1.776609 | 1.386882  |
| 22.C | 0.721975  | -2.000582 | 0.017458  |
| 23.C | -1.426175 | -2.144484 | -1.196511 |
| 24.C | -0.705827 | -2.319155 | -2.376067 |
| 25.C | 0.705827  | -2.319155 | -2.376067 |
| 26.C | 1.426175  | -2.144484 | -1.196511 |
| 27.H | 0.000000  | -1.728114 | 3.311169  |
| 28.H | 2.190124  | -1.779090 | 1.726579  |
| 29.H | -2.190124 | -1.779090 | 1.726579  |
| 30.H | -2.517602 | -2.134753 | -1.207521 |
| 31.H | -1.239533 | -2.453447 | -3.318153 |
| 32.H | 1.239533  | -2.453447 | -3.318153 |
| 33.H | 2.517602  | -2.134753 | -1.207521 |

**Fe( $\eta^5$ -Ind)( $\eta^6$ -Ind) (C<sub>s</sub>) S = 1, E<sub>T</sub> (BP86) = -208.854, E<sub>T</sub> (B3LYP/BP86) = -247.207.**

| Atom | X         | Y        | Z         |
|------|-----------|----------|-----------|
| 1.Fe | 0.693264  | 0.855689 | 0.000000  |
| 2.C  | -1.640142 | 1.018738 | 0.719479  |
| 3.C  | -1.640142 | 1.018738 | -0.719479 |
| 4.C  | -0.681202 | 2.028966 | -1.152613 |

|      |           |           |           |
|------|-----------|-----------|-----------|
| 5.C  | -0.232282 | 2.744247  | 0.000000  |
| 6.C  | -0.681202 | 2.028966  | 1.152613  |
| 7.C  | -2.461733 | 0.123451  | -1.425350 |
| 8.C  | -3.297266 | -0.731670 | -0.703821 |
| 9.C  | -3.297266 | -0.731670 | 0.703821  |
| 10.C | -2.461733 | 0.123451  | 1.425350  |
| 11.H | -0.505798 | 2.319994  | -2.186023 |
| 12.H | 0.383623  | 3.640180  | 0.000000  |
| 13.H | -0.505798 | 2.319994  | 2.186023  |
| 14.H | -2.463357 | 0.114447  | -2.516897 |
| 15.H | -3.960401 | -1.414942 | -1.236217 |
| 16.H | -3.960401 | -1.414942 | 1.236217  |
| 17.H | -2.463357 | 0.114447  | 2.516897  |
| 18.C | 1.635820  | -1.129573 | 0.736674  |
| 19.C | 2.145721  | 0.006471  | 1.423785  |
| 20.C | 2.797607  | 1.047941  | 0.707378  |
| 21.C | 2.797607  | 1.047941  | -0.707378 |
| 22.C | 2.145721  | 0.006471  | -1.423785 |
| 23.C | 1.635820  | -1.129573 | -0.736674 |
| 24.C | 1.029804  | -2.344681 | 1.156111  |
| 25.C | 0.689090  | -3.073993 | 0.000000  |
| 26.C | 1.029804  | -2.344681 | -1.156111 |
| 27.H | 2.093620  | 0.058308  | 2.512656  |
| 28.H | 3.223416  | 1.892198  | -1.249585 |
| 29.H | 2.093620  | 0.058308  | -2.512656 |
| 30.H | 3.223416  | 1.892198  | 1.249585  |
| 31.H | 0.864162  | -2.654170 | 2.185680  |
| 32.H | 0.214203  | -4.053512 | 0.000000  |
| 33.H | 0.864162  | -2.654170 | -2.185680 |

**Ru( $\eta^5$ -Ind)<sub>2</sub>(C<sub>2</sub>v) S = 0, E<sub>T</sub> (BP86) = -209.046, E<sub>T</sub> (B3LYP/BP86) = -248.022.**

|      |           |           |           |
|------|-----------|-----------|-----------|
| 1.Ru | 0.000000  | 0.000000  | 0.986361  |
| 2.C  | -0.729894 | 1.973663  | 0.028791  |
| 3.C  | 0.729894  | 1.973663  | 0.028791  |
| 4.C  | 1.167587  | 1.867344  | 1.396868  |
| 5.C  | 0.000000  | 1.843871  | 2.232395  |
| 6.C  | -1.167587 | 1.867344  | 1.396868  |
| 7.C  | 1.434866  | 2.091973  | -1.209681 |
| 8.C  | 0.716609  | 2.215404  | -2.376965 |
| 9.C  | -0.716609 | 2.215404  | -2.376965 |
| 10.C | -1.434866 | 2.091973  | -1.209681 |
| 11.H | 2.197419  | 1.887250  | 1.743630  |
| 12.H | 0.000000  | 1.835632  | 3.319187  |
| 13.H | -2.197419 | 1.887250  | 1.743630  |
| 14.H | 2.525633  | 2.102407  | -1.218508 |
| 15.H | 1.243496  | 2.321403  | -3.326142 |
| 16.H | -1.243496 | 2.321403  | -3.326142 |
| 17.H | -2.525633 | 2.102407  | -1.218508 |
| 18.C | -0.729894 | -1.973663 | 0.028791  |
| 19.C | -1.167587 | -1.867344 | 1.396868  |
| 20.C | 0.000000  | -1.843871 | 2.232395  |
| 21.C | 1.167587  | -1.867344 | 1.396868  |
| 22.C | 0.729894  | -1.973663 | 0.028791  |

|      |           |           |           |
|------|-----------|-----------|-----------|
| 23.C | -1.434866 | -2.091973 | -1.209681 |
| 24.C | -0.716609 | -2.215404 | -2.376965 |
| 25.C | 0.716609  | -2.215404 | -2.376965 |
| 26.C | 1.434866  | -2.091973 | -1.209681 |
| 27.H | 0.000000  | -1.835632 | 3.319187  |
| 28.H | 2.197419  | -1.887250 | 1.743630  |
| 29.H | -2.197419 | -1.887250 | 1.743630  |
| 30.H | -2.525633 | -2.102407 | -1.218508 |
| 31.H | -1.243496 | -2.321403 | -3.326142 |
| 32.H | 1.243496  | -2.321403 | -3.326142 |
| 33.H | 2.525633  | -2.102407 | -1.218508 |

**Ru( $\eta^5$ -Ind)( $\eta^6$ -Ind) ( $C_s$ ) S = 0, E<sub>T</sub> (BP86) = -208.505, E<sub>T</sub> (B3LYP/BP86) = -244.593.**

|      |           |           |           |
|------|-----------|-----------|-----------|
| 1.Ru | 0.176323  | 0.901845  | -0.001383 |
| 2.C  | -1.956382 | 0.272969  | 0.728751  |
| 3.C  | -1.955642 | 0.270804  | -0.728062 |
| 4.C  | -1.606935 | 1.598978  | -1.167135 |
| 5.C  | -1.443429 | 2.422763  | -0.003463 |
| 6.C  | -1.606647 | 1.602678  | 1.162937  |
| 7.C  | -2.277255 | -0.927507 | -1.432399 |
| 8.C  | -2.591754 | -2.057894 | -0.711518 |
| 9.C  | -2.593118 | -2.055324 | 0.719143  |
| 10.C | -2.279460 | -0.922626 | 1.437066  |
| 11.H | -1.571307 | 1.942163  | -2.198152 |
| 12.H | -1.263617 | 3.494929  | -0.005264 |
| 13.H | -1.568666 | 1.949199  | 2.192775  |
| 14.H | -2.283223 | -0.937809 | -2.523117 |
| 15.H | -2.846835 | -2.979259 | -1.236374 |
| 16.H | -2.849767 | -2.974570 | 1.246966  |
| 17.H | -2.287000 | -0.929034 | 2.527787  |
| 18.C | 1.928457  | -0.754097 | 0.746098  |
| 19.C | 1.947546  | 0.484990  | 1.437121  |
| 20.C | 2.106767  | 1.707308  | 0.721603  |
| 21.C | 2.109741  | 1.708981  | -0.714961 |
| 22.C | 1.954405  | 0.488919  | -1.434323 |
| 23.C | 1.931185  | -0.751459 | -0.746185 |
| 24.C | 1.857689  | -2.100701 | 1.161909  |
| 25.C | 1.837976  | -2.894758 | -0.004756 |
| 26.C | 1.860869  | -2.096140 | -1.167757 |
| 27.H | 1.903121  | 0.508033  | 2.527727  |
| 28.H | 2.208388  | 2.651985  | -1.253599 |
| 29.H | 1.915126  | 0.514454  | -2.524963 |
| 30.H | 2.203597  | 2.648981  | 1.262767  |
| 31.H | 1.839708  | -2.455671 | 2.188889  |
| 32.H | 1.816820  | -3.984247 | -0.006870 |
| 33.H | 1.847682  | -2.446893 | -2.196183 |

**Compounds for TNE = 27**

**Co( $\eta^5$ -Ind)<sub>2</sub> ( $C_{2v}$ ) S = 1/2, E<sub>T</sub> (BP86) = -208.865, E<sub>T</sub> (B3LYP/BP86) = -246.829.**

| Atom | X | Y | Z |
|------|---|---|---|
|------|---|---|---|

|      |           |           |           |
|------|-----------|-----------|-----------|
| 1.Co | 0.000000  | 0.000000  | 1.060339  |
| 2.C  | -0.724397 | 1.880342  | 0.013196  |
| 3.C  | 0.724397  | 1.880342  | 0.013196  |
| 4.C  | 1.157529  | 1.724934  | 1.391585  |
| 5.C  | 0.000000  | 1.744218  | 2.230748  |
| 6.C  | -1.157529 | 1.724934  | 1.391585  |
| 7.C  | 1.428911  | 1.987983  | -1.208087 |
| 8.C  | 0.708641  | 2.110133  | -2.389511 |
| 9.C  | -0.708641 | 2.110133  | -2.389511 |
| 10.C | -1.428911 | 1.987983  | -1.208087 |
| 11.H | 2.189115  | 1.717194  | 1.733388  |
| 12.H | 0.000000  | 1.719448  | 3.316742  |
| 13.H | -2.189115 | 1.717194  | 1.733388  |
| 14.H | 2.520458  | 1.987658  | -1.217902 |
| 15.H | 1.240406  | 2.208090  | -3.336879 |
| 16.H | -1.240406 | 2.208090  | -3.336879 |
| 17.H | -2.520458 | 1.987658  | -1.217902 |
| 18.C | -0.724397 | -1.880342 | 0.013196  |
| 19.C | -1.157529 | -1.724934 | 1.391585  |
| 20.C | 0.000000  | -1.744218 | 2.230748  |
| 21.C | 1.157529  | -1.724934 | 1.391585  |
| 22.C | 0.724397  | -1.880342 | 0.013196  |
| 23.C | -1.428911 | -1.987983 | -1.208087 |
| 24.C | -0.708641 | -2.110133 | -2.389511 |
| 25.C | 0.708641  | -2.110133 | -2.389511 |
| 26.C | 1.428911  | -1.987983 | -1.208087 |
| 27.H | 0.000000  | -1.719448 | 3.316742  |
| 28.H | 2.189115  | -1.717194 | 1.733388  |
| 29.H | -2.189115 | -1.717194 | 1.733388  |
| 30.H | -2.520458 | -1.987658 | -1.217902 |
| 31.H | -1.240406 | -2.208090 | -3.336879 |
| 32.H | 1.240406  | -2.208090 | -3.336879 |
| 33.H | 2.520458  | -1.987658 | -1.217902 |

**Co( $\eta^5$ -Ind)( $\eta^6$ -Ind) ( $C_I$ ) S = 1/2,  $E_T$  (BP86) = -208.258,  $E_T$  (B3LYP/BP86) = -246.015.**

| Atom | X         | Y         | Z         |
|------|-----------|-----------|-----------|
| 1.Co | -0.272076 | -0.174944 | -0.108627 |
| 2.C  | 0.991331  | 0.116192  | 1.829893  |
| 3.C  | 0.456357  | -1.223336 | 1.852649  |
| 4.C  | -0.981381 | -1.116317 | 1.623196  |
| 5.C  | -1.334509 | 0.270413  | 1.619933  |
| 6.C  | -0.125196 | 1.025096  | 1.597165  |
| 7.C  | 1.316286  | -2.323116 | 2.035762  |
| 8.C  | 2.680251  | -2.085168 | 2.203504  |
| 9.C  | 3.203999  | -0.774814 | 2.172682  |
| 10.C | 2.374893  | 0.329304  | 1.978576  |
| 11.H | -1.681571 | -1.948240 | 1.619891  |
| 12.H | -2.341081 | 0.676414  | 1.561974  |
| 13.H | -0.053359 | 2.107373  | 1.518948  |
| 14.H | 0.920212  | -3.339864 | 2.060627  |
| 15.H | 3.355942  | -2.925552 | 2.368001  |
| 16.H | 4.275633  | -0.625011 | 2.310586  |
| 17.H | 2.784704  | 1.339939  | 1.951464  |
| 18.C | 1.131519  | -0.351749 | -1.812283 |

|      |           |           |           |
|------|-----------|-----------|-----------|
| 19.C | 0.765902  | 1.022047  | -1.822950 |
| 20.C | -0.677878 | 1.403032  | -1.868990 |
| 21.C | -1.656553 | 0.377459  | -1.841332 |
| 22.C | -1.260469 | -0.978479 | -1.822358 |
| 23.C | 0.131582  | -1.348657 | -1.830555 |
| 24.C | -0.737003 | 2.812370  | -1.876838 |
| 25.C | 0.594020  | 3.287901  | -1.853404 |
| 26.C | 1.514300  | 2.223357  | -1.803919 |
| 27.H | 2.181769  | -0.641578 | -1.756085 |
| 28.H | -2.718651 | 0.626095  | -1.812351 |
| 29.H | -2.016878 | -1.762337 | -1.789498 |
| 30.H | 0.408926  | -2.401734 | -1.806756 |
| 31.H | -1.639638 | 3.417243  | -1.906853 |
| 32.H | 0.871697  | 4.341630  | -1.870554 |
| 33.H | 2.598229  | 2.301581  | -1.786725 |

**Rh( $\eta^5$ -Ind)<sub>2</sub> (C<sub>2v</sub>) S = 1/2, E<sub>T</sub> (BP86) = -207.550, E<sub>T</sub> (B3LYP/BP86) = -243.602.**

| Atom | X         | Y         | Z         |
|------|-----------|-----------|-----------|
| 1.Rh | 0.000000  | 0.000000  | 1.059542  |
| 2.C  | -0.723969 | 2.106056  | 0.009849  |
| 3.C  | 0.723969  | 2.106056  | 0.009849  |
| 4.C  | 1.157366  | 1.918071  | 1.381728  |
| 5.C  | 0.000000  | 1.915637  | 2.219295  |
| 6.C  | -1.157366 | 1.918071  | 1.381728  |
| 7.C  | 1.429588  | 2.278289  | -1.202351 |
| 8.C  | 0.707922  | 2.465422  | -2.375929 |
| 9.C  | -0.707922 | 2.465422  | -2.375929 |
| 10.C | -1.429588 | 2.278289  | -1.202351 |
| 11.H | 2.188855  | 1.935190  | 1.727180  |
| 12.H | 0.000000  | 1.904917  | 3.305908  |
| 13.H | -2.188855 | 1.935190  | 1.727180  |
| 14.H | 2.521016  | 2.281774  | -1.211495 |
| 15.H | 1.239666  | 2.621060  | -3.315940 |
| 16.H | -1.239666 | 2.621060  | -3.315940 |
| 17.H | -2.521016 | 2.281774  | -1.211495 |
| 18.C | -0.723969 | -2.106056 | 0.009849  |
| 19.C | -1.157366 | -1.918071 | 1.381728  |
| 20.C | 0.000000  | -1.915637 | 2.219295  |
| 21.C | 1.157366  | -1.918071 | 1.381728  |
| 22.C | 0.723969  | -2.106056 | 0.009849  |
| 23.C | -1.429588 | -2.278289 | -1.202351 |
| 24.C | -0.707922 | -2.465422 | -2.375929 |
| 25.C | 0.707922  | -2.465422 | -2.375929 |
| 26.C | 1.429588  | -2.278289 | -1.202351 |
| 27.H | 0.000000  | -1.904917 | 3.305908  |
| 28.H | 2.188855  | -1.935190 | 1.727180  |
| 29.H | -2.188855 | -1.935190 | 1.727180  |
| 30.H | -2.521016 | -2.281774 | -1.211495 |
| 31.H | -1.239666 | -2.621060 | -3.315940 |
| 32.H | 1.239666  | -2.621060 | -3.315940 |
| 33.H | 2.521016  | -2.281774 | -1.211495 |

**Rh( $\eta^5$ -Ind)( $\eta^6$ -Ind) ( $C_s$ ) S = 1/2, E<sub>T</sub> (BP86) = -206.401, E<sub>T</sub> (B3LYP/BP86) = -242.845.**

| Atom | X         | Y         | Z         |
|------|-----------|-----------|-----------|
| 1.Rh | 0.185694  | 0.993905  | 0.000000  |
| 2.C  | -2.111946 | 0.258648  | 0.722443  |
| 3.C  | -2.111946 | 0.258648  | -0.722443 |
| 4.C  | -1.667081 | 1.574066  | -1.155470 |
| 5.C  | -1.527967 | 2.403622  | 0.000000  |
| 6.C  | -1.667081 | 1.574066  | 1.155470  |
| 7.C  | -2.506698 | -0.894228 | -1.428871 |
| 8.C  | -2.917222 | -2.012670 | -0.705951 |
| 9.C  | -2.917222 | -2.012670 | 0.705951  |
| 10.C | -2.506698 | -0.894228 | 1.428871  |
| 11.H | -1.629509 | 1.916475  | -2.187581 |
| 12.H | -1.345223 | 3.474630  | 0.000000  |
| 13.H | -1.629509 | 1.916475  | 2.187581  |
| 14.H | -2.510062 | -0.903108 | -2.519843 |
| 15.H | -3.249535 | -2.905416 | -1.237314 |
| 16.H | -3.249535 | -2.905416 | 1.237314  |
| 17.H | -2.510062 | -0.903108 | 2.519843  |
| 18.C | 2.122510  | -0.806415 | 0.740016  |
| 19.C | 2.037545  | 0.435301  | 1.416961  |
| 20.C | 2.186872  | 1.667243  | 0.714148  |
| 21.C | 2.186872  | 1.667243  | -0.714148 |
| 22.C | 2.037545  | 0.435301  | -1.416961 |
| 23.C | 2.122510  | -0.806415 | -0.740016 |
| 24.C | 2.155685  | -2.148680 | 1.162546  |
| 25.C | 2.197203  | -2.953198 | 0.000000  |
| 26.C | 2.155685  | -2.148680 | -1.162546 |
| 27.H | 1.970901  | 0.460216  | 2.507513  |
| 28.H | 2.286532  | 2.603599  | -1.262464 |
| 29.H | 1.970901  | 0.460216  | -2.507513 |
| 30.H | 2.286532  | 2.603599  | 1.262464  |
| 31.H | 2.163648  | -2.501621 | 2.190711  |
| 32.H | 2.260116  | -4.040319 | 0.000000  |
| 33.H | 2.163648  | -2.501621 | -2.190711 |

### Compounds for TNE = 28

**Ni( $\eta^3$ -Ind)( $\eta^3$ -Ind) ( $C_{2h}$ ) S = 0, E<sub>T</sub> (BP86) = -205.950, E<sub>T</sub> (B3LYP/BP86) = -241.886.**

| Atom | X         | Y         | Z         |
|------|-----------|-----------|-----------|
| 1.Ni | 0.000000  | 0.000000  | 0.000000  |
| 2.C  | 0.983168  | -1.769972 | 0.000000  |
| 3.C  | 0.134528  | -1.755842 | -1.151686 |
| 4.C  | -1.231727 | -2.051069 | -0.718303 |
| 5.C  | -1.231727 | -2.051069 | 0.718303  |
| 6.C  | 0.134528  | -1.755842 | 1.151686  |
| 7.C  | -3.593137 | -2.544142 | -0.702316 |
| 8.C  | -2.418408 | -2.288681 | -1.422836 |
| 9.C  | -3.593137 | -2.544142 | 0.702316  |
| 10.C | -2.418408 | -2.288681 | 1.422836  |
| 11.H | 2.069144  | -1.716123 | 0.000000  |
| 12.H | 0.474900  | -1.760751 | -2.184879 |

|      |           |           |           |
|------|-----------|-----------|-----------|
| 13.H | 0.474900  | -1.760751 | 2.184879  |
| 14.H | -4.519481 | -2.756290 | -1.238223 |
| 15.H | -2.426662 | -2.289972 | -2.514790 |
| 16.H | -4.519481 | -2.756290 | 1.238223  |
| 17.H | -2.426662 | -2.289972 | 2.514790  |
| 18.C | 1.231727  | 2.051069  | 0.718303  |
| 19.C | -0.134528 | 1.755842  | 1.151686  |
| 20.C | -0.983168 | 1.769972  | 0.000000  |
| 21.C | -0.134528 | 1.755842  | -1.151686 |
| 22.C | 1.231727  | 2.051069  | -0.718303 |
| 23.C | 3.593137  | 2.544142  | -0.702316 |
| 24.C | 2.418408  | 2.288681  | -1.422836 |
| 25.C | 3.593137  | 2.544142  | 0.702316  |
| 26.C | 2.418408  | 2.288681  | 1.422836  |
| 27.H | -2.069144 | 1.716123  | 0.000000  |
| 28.H | -0.474900 | 1.760751  | 2.184879  |
| 29.H | -0.474900 | 1.760751  | -2.184879 |
| 30.H | 4.519481  | 2.756290  | -1.238223 |
| 31.H | 2.426662  | 2.289972  | -2.514790 |
| 32.H | 4.519481  | 2.756290  | 1.238223  |
| 33.H | 2.426662  | 2.289972  | 2.514790  |

**Ni( $\eta^4$ -Ind)( $\eta^3$ -Ind) ( $C_S$ )  $S = 0$ ,  $E_T$  (BP86) = -205.542,  $E_T$  (B3LYP/BP86) = -240.894.**

| Atom | X         | Y         | Z         |
|------|-----------|-----------|-----------|
| 1.Ni | 0.233036  | 1.258917  | 0.000000  |
| 2.C  | -1.979936 | 0.157879  | 0.718252  |
| 3.C  | -1.979936 | 0.157879  | -0.718252 |
| 4.C  | -1.557434 | 1.492566  | -1.150277 |
| 5.C  | -1.479002 | 2.337705  | 0.000000  |
| 6.C  | -1.557434 | 1.492566  | 1.150277  |
| 7.C  | -2.300880 | -1.004189 | -1.422893 |
| 8.C  | -2.641132 | -2.160309 | -0.699782 |
| 9.C  | -2.641132 | -2.160309 | 0.699782  |
| 10.C | -2.300880 | -1.004189 | 1.422893  |
| 11.H | -1.527116 | 1.834162  | -2.182752 |
| 12.H | -1.363936 | 3.418917  | 0.000000  |
| 13.H | -1.527116 | 1.834162  | 2.182752  |
| 14.H | -2.291721 | -1.017155 | -2.514412 |
| 15.H | -2.904140 | -3.072043 | -1.237387 |
| 16.H | -2.904140 | -3.072043 | 1.237387  |
| 17.H | -2.291721 | -1.017155 | 2.514412  |
| 18.C | 1.919022  | -0.825775 | 0.731618  |
| 19.C | 1.941229  | 0.406685  | 1.411212  |
| 20.C | 2.164880  | 1.631818  | 0.712176  |
| 21.C | 2.164880  | 1.631818  | -0.712176 |
| 22.C | 1.941229  | 0.406685  | -1.411212 |
| 23.C | 1.919022  | -0.825775 | -0.731618 |
| 24.C | 1.819655  | -2.176196 | 1.154939  |
| 25.C | 1.782126  | -2.985249 | 0.000000  |
| 26.C | 1.819655  | -2.176196 | -1.154939 |
| 27.H | 1.864386  | 0.434960  | 2.500611  |
| 28.H | 2.337330  | 2.554279  | -1.265193 |
| 29.H | 1.864386  | 0.434960  | -2.500611 |



|      |          |           |           |
|------|----------|-----------|-----------|
| 30.H | 2.337330 | 2.554279  | 1.265193  |
| 31.H | 1.787711 | -2.524991 | 2.184781  |
| 32.H | 1.724928 | -4.071952 | 0.000000  |
| 33.H | 1.787711 | -2.524991 | -2.184781 |

**Ni( $\eta^3$ -Ind)( $\eta^3$ -Ind) ( $C_{2h}$ ) S = 1, E<sub>T</sub> (BP86) = -205.698, E<sub>T</sub> (B3LYP/BP86) = -241.886.**

| Atom | X         | Y         | Z         |
|------|-----------|-----------|-----------|
| 1.Ni | 0.000000  | 0.000000  | 0.000000  |
| 2.C  | 1.106745  | -1.816596 | 0.000000  |
| 3.C  | 0.280093  | -1.871123 | -1.165951 |
| 4.C  | -1.081463 | -2.023066 | -0.729791 |
| 5.C  | -1.081463 | -2.023066 | 0.729791  |
| 6.C  | 0.280093  | -1.871123 | 1.165951  |
| 7.C  | -3.479239 | -2.327443 | -0.712149 |
| 8.C  | -2.306586 | -2.168429 | -1.430623 |
| 9.C  | -3.479239 | -2.327443 | 0.712149  |
| 10.C | -2.306586 | -2.168429 | 1.430623  |
| 11.H | 2.192291  | -1.757354 | 0.000000  |
| 12.H | 0.628208  | -1.867350 | -2.195046 |
| 13.H | 0.628208  | -1.867350 | 2.195046  |
| 14.H | -4.423510 | -2.463319 | -1.241687 |
| 15.H | -2.317531 | -2.178649 | -2.522247 |
| 16.H | -4.423510 | -2.463319 | 1.241687  |
| 17.H | -2.317531 | -2.178649 | 2.522247  |
| 18.C | 1.081463  | 2.023066  | 0.729791  |
| 19.C | -0.280093 | 1.871123  | 1.165951  |
| 20.C | -1.106745 | 1.816596  | 0.000000  |
| 21.C | -0.280093 | 1.871123  | -1.165951 |
| 22.C | 1.081463  | 2.023066  | -0.729791 |
| 23.C | 3.479239  | 2.327443  | -0.712149 |
| 24.C | 2.306586  | 2.168429  | -1.430623 |
| 25.C | 3.479239  | 2.327443  | 0.712149  |
| 26.C | 2.306586  | 2.168429  | 1.430623  |
| 27.H | -2.192291 | 1.757354  | 0.000000  |
| 28.H | -0.628208 | 1.867350  | 2.195046  |
| 29.H | -0.628208 | 1.867350  | -2.195046 |
| 30.H | 4.423510  | 2.463319  | -1.241687 |
| 31.H | 2.317531  | 2.178649  | -2.522247 |
| 32.H | 4.423510  | 2.463319  | 1.241687  |
| 33.H | 2.317531  | 2.178649  | 2.522247  |

**Pd( $\eta^3$ -Ind)( $\eta^3$ -Ind) ( $C_{2h}$ ) S = 0, E<sub>T</sub> (BP86) = -203.381, E<sub>T</sub> (B3LYP/BP86) = -237.628.**

| Atom | X         | Y         | Z         |
|------|-----------|-----------|-----------|
| 1.Pd | -0.003381 | 0.004770  | 0.001541  |
| 2.C  | 0.852400  | -2.040358 | -0.002050 |
| 3.C  | 0.012673  | -2.022702 | -1.153020 |
| 4.C  | -1.357434 | -2.306624 | -0.717327 |
| 5.C  | -1.356305 | -2.310390 | 0.714891  |
| 6.C  | 0.013892  | -2.025769 | 1.149801  |

|      |           |           |           |
|------|-----------|-----------|-----------|
| 7.C  | -3.714704 | -2.811425 | -0.701432 |
| 8.C  | -2.538942 | -2.546434 | -1.422298 |
| 9.C  | -3.713042 | -2.817328 | 0.700368  |
| 10.C | -2.535724 | -2.558769 | 1.420497  |
| 11.H | 1.938677  | -2.025786 | -0.002672 |
| 12.H | 0.361816  | -2.052286 | -2.181987 |
| 13.H | 0.363771  | -2.059619 | 2.178429  |
| 14.H | -4.639478 | -3.025177 | -1.238867 |
| 15.H | -2.547332 | -2.544214 | -2.513997 |
| 16.H | -4.636254 | -3.036603 | 1.238424  |
| 17.H | -2.542145 | -2.564741 | 2.512223  |
| 18.C | 1.358105  | 2.313636  | 0.714707  |
| 19.C | -0.013333 | 2.033534  | 1.149574  |
| 20.C | -0.851661 | 2.051821  | -0.002344 |
| 21.C | -0.011748 | 2.030341  | -1.153132 |
| 22.C | 1.359467  | 2.310440  | -0.717006 |
| 23.C | 3.720039  | 2.796788  | -0.701806 |
| 24.C | 2.541071  | 2.546144  | -1.423003 |
| 25.C | 3.718106  | 2.803584  | 0.700065  |
| 26.C | 2.537668  | 2.558433  | 1.420511  |
| 27.H | -1.937906 | 2.041489  | -0.003231 |
| 28.H | -0.363453 | 2.068611  | 2.178111  |
| 29.H | -0.360453 | 2.060347  | -2.182248 |
| 30.H | 4.646675  | 3.002518  | -1.239099 |
| 31.H | 2.549336  | 2.542899  | -2.514601 |
| 32.H | 4.643108  | 3.015132  | 1.238171  |
| 33.H | 2.543472  | 2.565708  | 2.512300  |

**Pd( $\eta^4$ -Ind)( $\eta^3$ -Ind) ( $C_s$ ) S = 0, E<sub>T</sub> (BP86) = -202.775, E<sub>T</sub> (B3LYP/BP86) = -236.892.**

| Atom | X         | Y         | Z         |
|------|-----------|-----------|-----------|
| 1.Pd | 0.205781  | 1.394851  | 0.000000  |
| 2.C  | -2.208846 | 0.126645  | 0.717053  |
| 3.C  | -2.208846 | 0.126645  | -0.717053 |
| 4.C  | -1.864683 | 1.480835  | -1.150859 |
| 5.C  | -1.821473 | 2.319363  | 0.000000  |
| 6.C  | -1.864683 | 1.480835  | 1.150859  |
| 7.C  | -2.490920 | -1.043463 | -1.421345 |
| 8.C  | -2.789518 | -2.212735 | -0.699675 |
| 9.C  | -2.789518 | -2.212735 | 0.699675  |
| 10.C | -2.490920 | -1.043463 | 1.421345  |
| 11.H | -1.873503 | 1.828750  | -2.180903 |
| 12.H | -1.767800 | 3.404723  | 0.000000  |
| 13.H | -1.873503 | 1.828750  | 2.180903  |
| 14.H | -2.485210 | -1.054935 | -2.512735 |
| 15.H | -3.023514 | -3.131620 | -1.238328 |
| 16.H | -3.023514 | -3.131620 | 1.238328  |
| 17.H | -2.485210 | -1.054935 | 2.512735  |
| 18.C | 2.222340  | -1.043617 | 0.728062  |
| 19.C | 2.266588  | 0.169723  | 1.421243  |
| 20.C | 2.387269  | 1.397641  | 0.714221  |
| 21.C | 2.387269  | 1.397641  | -0.714221 |
| 22.C | 2.266588  | 0.169723  | -1.421243 |
| 23.C | 2.222340  | -1.043617 | -0.728062 |
| 24.C | 2.109020  | -2.399455 | 1.150671  |

|      |          |           |           |
|------|----------|-----------|-----------|
| 25.C | 2.052474 | -3.210815 | 0.000000  |
| 26.C | 2.109020 | -2.399455 | -1.150671 |
| 27.H | 2.242900 | 0.188214  | 2.513272  |
| 28.H | 2.600139 | 2.317265  | -1.257601 |
| 29.H | 2.242900 | 0.188214  | -2.513272 |
| 30.H | 2.600139 | 2.317265  | 1.257601  |
| 31.H | 2.072226 | -2.745007 | 2.181739  |
| 32.H | 1.969735 | -4.295544 | 0.000000  |
| 33.H | 2.072226 | -2.745007 | -2.181739 |
